# Supplementary material for: Reporting quality of randomised controlled trial abstracts on age-related macular degeneration health care: a cross-sectional quantification of the adherence to CONSORT abstract reporting recommendations
Source: PubMed Central journal article supplement — BMJ Open. 2018 May 22;8(5):e021912. doi: 10.1136/bmjopen-2018-021912 (PMC5988143; doi:10.1136/bmjopen-2018-021912), 2018-05-22
Supplement: bmjopen-2018-021912.draft_revisions.pdf [file bmjopen-2018-021912.draft_revisions.pdf]

# BMJ Open

BMJ Open is committed to open peer review. As part of this commitment we make the peer review history of every article we publish publicly available.

When an article is published we post the peer reviewers' comments and the authors' responses online. We also post the versions of the paper that were used during peer review. These are the versions that the peer review comments apply to.

The versions of the paper that follow are the versions that were submitted during the peer review process. They are not the versions of record or the final published versions. They should not be cited or distributed as the published version of this manuscript.

BMJ Open is an open access journal and the full, final, typeset and author-corrected version of record of the manuscript is available on our site with no access controls, subscription charges or pay-per-view fees (<http://bmjopen.bmj.com>).

If you have any questions on BMJ Open's open peer review process please email [info.bmjopen@bmj.com](mailto:info.bmjopen@bmj.com)

# BMJ Open

## Reporting Quality of Randomised Controlled Trial Abstracts on Age-Related Macular Degeneration Health Care – A Cross Sectional Quantification of the Adherence to CONSORT Abstract Reporting Recommendations

|                               |                                                                                                                                                                                                                                                                                                                                                                                                                                                                                                                                                                                                                                  |
|-------------------------------|----------------------------------------------------------------------------------------------------------------------------------------------------------------------------------------------------------------------------------------------------------------------------------------------------------------------------------------------------------------------------------------------------------------------------------------------------------------------------------------------------------------------------------------------------------------------------------------------------------------------------------|
| Journal:                      | <i>BMJ Open</i>                                                                                                                                                                                                                                                                                                                                                                                                                                                                                                                                                                                                                  |
| Manuscript ID                 | bmjopen-2018-021912                                                                                                                                                                                                                                                                                                                                                                                                                                                                                                                                                                                                              |
| Article Type:                 | Research                                                                                                                                                                                                                                                                                                                                                                                                                                                                                                                                                                                                                         |
| Date Submitted by the Author: | 25-Jan-2018                                                                                                                                                                                                                                                                                                                                                                                                                                                                                                                                                                                                                      |
| Complete List of Authors:     | Baulig, Christine; Institute for Medical Biometry and Epidemiology, Witten/Herdecke University , Department of Medicine<br>Krummenauer, Frank; Institute for Medical Biometry and Epidemiology, Witten/Herdecke University , Department of Medicine<br>Geis, Berit; Institute for Medical Biometry and Epidemiology, Witten/Herdecke University , Department of Medicine<br>Tulka, Sabrina; Institute for Medical Biometry and Epidemiology, Witten/Herdecke University , Department of Medicine<br>Knippschild, Stephanie; Institute for Medical Biometry and Epidemiology, Witten/Herdecke University, Departement of Medicine |
| Keywords:                     | reporting quality, Abstract, randomized controlled trial, CONSORT, age related macula degeneration                                                                                                                                                                                                                                                                                                                                                                                                                                                                                                                               |
|                               |                                                                                                                                                                                                                                                                                                                                                                                                                                                                                                                                                                                                                                  |

SCHOLARONE™  
Manuscripts

Only

1  
2  
3 **Systematic review of reporting quality of Randomised Controlled Trial Abstracts on**  
4 **Age-Related Macular Degeneration Health Care – A Cross Sectional Quantification of**  
5 **the Adherence to CONSORT Abstract Reporting Recommendations**  
6  
7

8  
9 Christine Baulig, Frank Krummenauer, Berit Geis, Sabrina Tulka, Stephanie Knippschild

10  
11  
12 Corresponding author:

13 JProf Christine Baulig MSc  
14 Institute for Medical Biometry and Epidemiology  
15 Faculty of Health, Witten/Herdecke University  
16 Alfred-Herrhausen-Straße 50  
17 58448 Witten, Germany  
18 Phone: +49 (0)2302 926 782  
19 E-mail: Christine.Baulig@uni-wh.de  
20  
21

22  
23 Co-Authors:

24  
25 Prof Frank Krummenauer  
26 Institute for Medical Biometry and Epidemiology  
27 Faculty of Health, Witten/Herdecke University  
28 Alfred-Herrhausen-Straße 50  
29 58448 Witten, Germany  
30

31 MSc Berit Geis  
32 Institute for Medical Biometry and Epidemiology  
33 Faculty of Health, Witten/Herdecke University  
34 Alfred-Herrhausen-Straße 50  
35 58448 Witten, Germany  
36  
37

38 MSc Sabrina Tulka  
39 Institute for Medical Biometry and Epidemiology  
40 Faculty of Health, Witten/Herdecke University  
41 Alfred-Herrhausen-Straße 50  
42 58448 Witten, Germany  
43

44 Dr Stephanie Knippschild  
45 Institute for Medical Biometry and Epidemiology  
46 Faculty of Health, Witten/Herdecke University  
47 Alfred-Herrhausen-Straße 50  
48 58448 Witten, Germany  
49  
50

51  
52  
53 **Word count: 3.706**  
54  
55  
56  
57  
58  
59  
60

1  
2  
3 Objective: To assess the reporting quality of RCT abstracts on AMD health care, to evaluate  
4 the adherence to the CONSORT statement's recommendations on minimum abstract  
5 information and to identify journal characteristics associated with abstract reporting quality.  
6

7  
8 Design: Cross-sectional evaluation of RCT abstracts on AMD health care  
9

10 Methods: A PubMed search was implemented to identify RCT abstracts on AMD health care  
11 published in English language between 01/2004 and 12/2013. Data extraction was  
12 performed by two parallel readers independently by means of a documentation format in  
13 accordance with the 16 items of the CONSORT checklist for abstracts. The total number of  
14 criteria fulfilled by an abstract was derived as primary endpoint of the investigation, incidence  
15 rate ratios (IRRs) with un-adjusted 95% confidence intervals (95% CI) were estimated by  
16 means of multiple Poisson regression to identify journal and article characteristics  
17 (publication year, multicentre design, structured abstract recommendations, effective sample  
18 size, word count limits and journal impact factor) possibly associated with the total number of  
19 fulfilled items.  
20  
21  
22  
23  
24

25  
26 Study characteristics: 136 of 673 identified abstracts (published in 36 different journals)  
27 fulfilled all eligibility criteria.  
28

29  
30 Results: The median number of fulfilled items was 7 (95% CI 7; 8). No abstract reported all  
31 16 recommended items; the maximum total number was 14, the minimum 3 of 16 items.  
32 Multivariate analysis only demonstrated a journal's word count limitation (>250 vs ≤ 250) as  
33 being significantly associated with a better reporting of abstracts (Incidence Rate Ratio (IRR)  
34 1.152, 95% CI 1.010; 1.0314).  
35  
36

37  
38 Conclusions: Reporting quality of RCT abstracts on AMD investigations showed a  
39 considerable potential for improvement to meet the CONSORT abstract reporting  
40 recommendations. Furthermore, word count limits for abstracts of 250 were identified as a  
41 significant determinant of the overall abstract reporting quality.  
42  
43

44 Key Words: RCT, structured abstract, CONSORT statement, reporting quality  
45  
46  
47  
48  
49  
50  
51  
52  
53  
54  
55  
56  
57  
58  
59  
60

### Strengths and limitations of this study

- Reporting quality of RCT abstracts on AMD therapy has not been assessed so far.
- The cross-sectional inclusion of all published RCT abstracts on AMD health care without selection of journals ensures maximum possible representativeness.
- Data extraction and evaluation were performed by two independent readers with long-term experience in clinical trial methodology and reporting bias evaluation.
  
- The readers were not blinded to the journal and publication period so the possibility of reader bias cannot be ruled out entirely.
- Journal characteristics such as formal word count limitations could only be considered as far as published by the journals; the individual reviewing processes underlying the 136 abstracts might have taken additional influence on the actual abstract presentations.

**Funding:** This work was supported by the Internal Research Foundation Initiative of the Witten / Herdecke University's Faculty of Health, comprising a one-year research position for SK (grant number IFF 2016-001).

### Competing interests

The authors declare that they have no competing interests. From the perspective of Good Scientific Practice the authors state, that parts of this manuscript will be presented orally and by means of a congress abstract to be submitted to the 2018 annual meeting of the German Ophthalmic Surgeons (DOC congress, Nuremberg, June 2018).

## INTRODUCTION

Randomised controlled trials (RCT) are considered as optimum origin of evidence and have the highest grade of research designs[1, 2]. Frequently, readers of articles reporting on RCT start by screening the content of the abstract first, which subsequently guides the decision whether or not to obtain and read the entire article[3]. In addition to an overwhelming day-to-day workload, a steadily increasing number of publications and limited access to many full-text articles enforce health care providers to build their health care decisions on information in abstracts[4]. Thus, abstracts of RCTs should contain accurate and clear information about implementation, evaluation, findings and synopsis of the clinical trial[5].

Regarding the methodological details, there was no standardised reporting requirement before the Consolidated Standards of Reporting Trials (CONSORT) were established in 1996[6] and revised in 2001[7] and 2010[8, 9], respectively. In order to prevent discrepancies between full-text articles and abstracts, as well as to improve the reporting quality of abstracts, an extension to the CONSORT Statement was published in 2008[5]. This statement contains 17 items comprising eight sections: title, authors' details (specific to conference abstracts), trial design, methods (including participants, interventions, objectives, defined primary outcome, randomisation, blinding), results (numbers randomised, recruitment, numbers analysed, outcomes, harms), conclusions, trial registration and declaration of funding[5]. This enumeration "provides a minimum list of essential items, that authors should consider when reporting the main results of a randomized trial in any journal or conference abstract"[5].

Several studies have been conducted to evaluate the quality of abstract reporting in general medical journals[10-14] or specific fields of medicine such as health care[15], anaesthesia[16], traditional Chinese medicine[17], HIV/AIDS[3], paediatrics[18], dentistry[19-22] and oncology[23]. These studies thoroughly demonstrated, that there is still a need for optimisation in the reporting of RCT abstracts.

To our knowledge, the reporting quality of RCT abstracts in the field of ophthalmology and especially regarding the treatment of age-related macular degeneration (AMD) has not been assessed yet. AMD is a common eye disease and the leading cause for vision loss among people 50 years of age and older[24], having led to increasing research need on therapeutic concepts and thereby to an increasing number of RCTs on AMD during the past decade. Therefore, the objectives of the present systematic review were to assess the reporting quality of RCT abstracts in AMD health care, to evaluate the adherence to the CONSORT statement's recommendations on minimum abstract information and to identify journal characteristics associated with this parameterisation of abstract reporting quality.

## METHODS

### Study design

Cross-sectional evaluation of RCT abstracts on AMD health care published between 2004 and 2013 was implemented; to identify eligible RCT publication abstracts, a systematic review of abstracts was performed without any restrictions of publishing journals, according to the PRISMA reporting guidance (see online supplementary material for PRISMA checklist).

### Data sources and search strategy

A MEDLINE/Pubmed search for all RCTs published between 2004 and 2013 was performed. The search strategy used the MeSH terms “randomised controlled trial” as publication type and “macular degeneration” as term in title / abstract and was limited to the publication date (2004/01/01 to 2013/12/31) as well as to English as publication language. The publication period was limited in order to reflect the period five years before and after the publication of the extension of CONSORT in 2008. The search was carried out on 2015/09/24 as can be reproduced by online audit trail documentation (supplementary material).

### Study selection

Only abstracts reporting on age-related macular degeneration (AMD) health care were considered and then investigated for indications of an underlying RCT design: we included abstracts in which the allocation of participants to interventions was described by the words “random”, “randomly”, “randomised”, “randomisation” or any other terminology suggesting that the participants were randomly distributed to treatment arms. Reports not associated with AMD therapy, without reference to randomisation or an obviously retrospective study design, economic analyses, diagnostic or screening tests, questionnaire reporting, study protocols, observational studies, editorials or letters were excluded as well as reviews, meta-analyses and non-human studies. Two parallel reviewers (CB, SK) independently selected the abstracts; disagreement about which abstracts had to be included was resolved by discussion and consensus, reasons for article exclusion were documented.

### Data extraction

1  
2  
3 A pilot study was performed with randomly selected abstracts concerning cataract surgery to  
4 identify problems and solve discrepancies in data collection[25]. The data extraction was  
5 performed independently by two parallel reviewers (CB, SK) using the previously created and  
6 pretested data extraction and documentation form in accordance to the items of the  
7 CONSORT checklist for abstracts[5]. Each item had a “yes”/“no” rating indicating whether the  
8 authors had reported this item or not. Only the “authors’ details” item concerning contact  
9 details of the corresponding authors was excluded from the assessment, since this item is  
10 specific to conference abstracts. For the “outcomes” item two sub-items were evaluated – as  
11 required by the CONSORT Statement: 1) primary outcome result presented for each group /  
12 arm, 2) for primary outcome, effect size reported for trials with binary outcome resp. with  
13 continuous outcome and the precision of effect side (confidence interval (CI)). Only if both  
14 criteria were met, a correct reporting of the outcome results items was ascertained. For the  
15 “conclusions” item also two sub-items had to be reported: 1) consistency with the reported  
16 results and 2) discussion of benefits of and harms from the intervention. Again, only if both  
17 sub-items were reported, the correct reporting of “conclusions” was ascertained.  
18  
19  
20  
21  
22  
23  
24

25  
26 Furthermore the following information on journal and article characteristics were collected:  
27 name of the journal, name of first author, year of publication, multicentre design [yes/no],  
28 abstract format pre-specified as structured [yes/no], sample size, impact factor of each  
29 journal according to the respective publication year. Due to the fact that word count limits in  
30 instructions for authors were found to show severe deviations from the number of words  
31 actually used in the abstract, both counts were recorded (word count limitation (status 2017);  
32 actual words count in the abstract). In addition, since only the current word count  
33 specifications of each journal could be found (status 2017), the actual number of words for  
34 each abstract was determined and subdivided into two groups [ $\leq 250$  /  $> 250$  words].  
35  
36  
37  
38  
39  
40  
41

#### 42 Primary Endpoint and Sample Size Calculation

43  
44 The abstract-wise primary endpoint of this investigation was the total absolute number of  
45 items (among all 16 considered) reported in the respective abstract. The primary hypothesis  
46 of this investigation was that the proportion of RCT publications showing incomplete or  
47 invalid abstract information – as documented by a total score  $< 16$  – were at least 50%; the  
48 primary hypothesis was then to be evaluated by means of a two-sided exact (binomial  
49 distribution) confidence interval for the respective observed proportion.  
50  
51  
52  
53

54 Under the assumption of an expected proportion of 50% by means of a two-sided exact  
55 confidence interval controlling for a maximum width less than  $\pm 10\%$  the sample size  
56 calculation resulted in a required number of cases of 97 abstracts (sample size calculation  
57  
58  
59  
60



1  
2  
3 being based on NQuery Advisor® 7.0 for Windows®). Therefore, we decided to evaluate all  
4 existing abstracts (N = 136) and did not draw a random sample.  
5  
6  
7

### 8 9 Exploratory Analysis

10  
11 Descriptive analysis of the primary endpoint was based on medians and quartiles, graphical  
12 presentation on box whisker plots, accordingly. For each CONSORT abstract item Cohen's  
13 kappa (point estimate and one-sided 95% confidence interval) were derived to assess the  
14 parallel readers' agreement, respectively. A kappa point estimate of 0.60 or higher was  
15 considered as an indication for substantial inter-observer agreement in the evaluation of the  
16 respective item.  
17  
18  
19  
20  
21  
22

### 23 24 Multivariate Analysis

25  
26 Incidence rate ratios (IRRs) with 95% confidence intervals (95% CI, not adjusted for  
27 multiplicity with regard to the exploratory character of the multivariate analysis) were  
28 estimated by means of multiple Poisson regression to identify journal and article  
29 characteristics (publication year, multicentre design, structured abstract recommendations,  
30 effective sample size, word count limits and journal impact factor) possibly associated with  
31 the total number of fulfilled criteria. Poisson regression modelling was performed by  
32 backward variable selection via the AIC criterion, considering Likelihood Ratio test p-values <  
33 0.05 as indicators of local statistical significance (i.e. model exploration results were not  
34 formally adjusted for multiplicity). The multivariate analysis was conducted using "R" version  
35 3.4.0 (R Core Team, 2017).  
36  
37  
38  
39  
40  
41  
42

## 43 44 RESULTS

45  
46 Out of 673 identified study publications, 15 had to be excluded in the first place, because no  
47 abstracts were available (Figure 1). Furthermore 522 publications had to be excluded due to  
48 the following facts: study not related to AMD health care (n=376); abstracts without indication  
49 for randomisation (n=127); non-comparative trial design (e.g., questionnaire survey,  
50 diagnostic evaluation, health economic analyses n=19). In summary, a total of 136 abstracts  
51 fulfilling the eligibility criteria were included in the investigation.  
52  
53  
54  
55  
56

### 57 58 Characteristics of included abstracts and underlying journals

The search yielded 136 abstracts of which 55 (40%) were published between 2004 and 2008 (pre-CONSORT) and 81 (n=60%) between 2009 and 2013 (post-CONSORT). The abstracts were published in 36 different journals, of which only two (publishing four articles) had no Thomson & Reuter impact factor. The median impact factor of all journals – according to the respective publication year – was 3.125 (interquartile range Q1 2.367; Q3 5.127). Only seven studies (5%) were published in journals with an impact factor of 10 or higher. Most of the publications (32%) were found in “Ophthalmology” (43/136) followed by “British Journal of Ophthalmology” 10% (13/136) and “Retina” 9% (12/136) (Table 1).

Only one journal did not state word count limits for abstracts in the instructions for authors (status 2017). All other 35 journals limited the words in abstracts to a total number between 200 and 500 words (see Table 1). The actual number of words in abstracts varied between 141 (minimum) and 457 (maximum) with a median of 273 words. 70 (51%) studies were single-centre trials with a minimum sample size of 7 participants up to 300 participants (median 46, Q1 28; Q3 10), and 66 (49%) studies were multi-centre trials with a minimum sample size of 25 participants up to 2457 participants (median 223, Q1 117; Q3 494).

**Table 1**

Listings of journals with at least one AMD RCT abstract considered in the evaluation, total number of publications (N) with abstracts evaluation from the respective journal as well as relative frequency [%] of these abstracts among all abstracts considered in this investigation, 5-years impact factor (Thomson & Reuter, 2016), as well as information on word count limits according to the published instructions for authors of the respective journals (status 2017).

| <b>Journal</b><br><i>(Journal Title Abbreviation)</i> | <b>N</b> | <b>proportion</b><br><i>(%)</i> | <b>5-years IF</b><br><i>(2016)</i> | <b>word count</b><br><b>limits</b> <i>(words)</i> |
|-------------------------------------------------------|----------|---------------------------------|------------------------------------|---------------------------------------------------|
| Am J Ophthalmol                                       | 9        | 7                               | 4.797                              | 250                                               |
| Ophthalmology                                         | 43       | 32                              | 7.788                              | 350                                               |
| Graefes Arch Clin Exp Ophthalmol                      | 4        | 3                               | 2.274                              | 250                                               |
| Br J Nutr                                             | 1        | 1                               | 3.784                              | 250                                               |
| Clin Hemorheol Microcirc                              | 1        | 1                               | 1.647                              | 200                                               |
| Atheroscler Suppl                                     | 1        | 1                               | 3.310                              | 250                                               |
| N Engl J Med                                          | 4        | 3                               | 64.201                             | 250                                               |
| Retina                                                | 12       | 9                               | 3.779                              | 200                                               |
| Arch Ophthalmol                                       | 5        | 4                               | 4.372                              | 350                                               |
| Br J Ophthalmol                                       | 13       | 10                              | 3.466                              | 250                                               |

|    |                                         |            |   |        |     |
|----|-----------------------------------------|------------|---|--------|-----|
| 1  |                                         |            |   |        |     |
| 2  |                                         |            |   |        |     |
| 3  | Scand J Occup Ther                      | 1          | 1 | 1.561  | 200 |
| 4  | Acta Ophthalmologica                    | 7          | 5 | 2.812  | 250 |
| 5  | Eye (Lond)                              | 5          | 4 | 2.547  | 250 |
| 6  | Nutrients                               | 1          | 1 | 4.187  | 200 |
| 7  | PLoS One                                | 1          | 1 | 3.394  | 300 |
| 8  | Nutrition                               | 2          | 2 | 3.312  | 250 |
| 9  | Curr Med Res Opin                       | 1          | 1 | 2.605  | 250 |
| 10 | Invest Ophthalmol Vis Sci               | 4          | 3 | 3.786  | 250 |
| 11 | Clin Rehabil                            | 1          | 1 | 3.026  | 250 |
| 12 | Trans Am Ophthalmol Soc                 | 1          | 1 | 0.000  | 250 |
| 13 | Optometry                               | 3          | 2 | 0.000  | 250 |
| 14 | Biomedical Papers                       | 1          | 1 | 1.160  | 250 |
| 15 | J Clin Neurosci                         | 1          | 1 | 1.545  | 250 |
| 16 | BMJ                                     | 1          | 1 | 19.355 |     |
| 17 | Proc Natl Acad Sci U S A                | 1          | 1 | 10.414 | 250 |
| 18 | JAMA Ophthalmol                         | 1          | 1 | 5.425  | 350 |
| 19 | Eur J Ophthalmol                        | 1          | 1 | 1.161  | 250 |
| 20 | Complementary and Alternative Medicines | 1          | 1 | 2.644  | 300 |
| 21 | BMC Ophthalmology                       | 1          | 1 | 1.579  | 350 |
| 22 | Experimental Eye Research               | 2          | 2 | 3.235  | 500 |
| 23 | Current Eye Research                    | 2          | 2 | 1.947  | 300 |
| 24 | Annals of Nutrition and Metabolism      | 1          | 1 | 2.883  | 250 |
| 25 | Lancet                                  | 1          | 1 | 48.082 | 300 |
| 26 | Ophthalmologica                         | 1          | 1 | 1.918  | 250 |
| 27 | J Ocul Pharmacol Ther                   | 1          | 1 | 1.726  | 250 |
| 28 | <b>Total</b>                            | <b>136</b> |   |        |     |
| 29 |                                         |            |   |        |     |
| 30 |                                         |            |   |        |     |
| 31 |                                         |            |   |        |     |
| 32 |                                         |            |   |        |     |
| 33 |                                         |            |   |        |     |
| 34 |                                         |            |   |        |     |
| 35 |                                         |            |   |        |     |
| 36 |                                         |            |   |        |     |
| 37 |                                         |            |   |        |     |
| 38 |                                         |            |   |        |     |
| 39 |                                         |            |   |        |     |
| 40 |                                         |            |   |        |     |
| 41 |                                         |            |   |        |     |
| 42 |                                         |            |   |        |     |
| 43 |                                         |            |   |        |     |
| 44 |                                         |            |   |        |     |
| 45 |                                         |            |   |        |     |
| 46 |                                         |            |   |        |     |
| 47 |                                         |            |   |        |     |
| 48 |                                         |            |   |        |     |
| 49 |                                         |            |   |        |     |
| 50 |                                         |            |   |        |     |
| 51 |                                         |            |   |        |     |
| 52 |                                         |            |   |        |     |
| 53 |                                         |            |   |        |     |
| 54 |                                         |            |   |        |     |
| 55 |                                         |            |   |        |     |
| 56 |                                         |            |   |        |     |
| 57 |                                         |            |   |        |     |
| 58 |                                         |            |   |        |     |
| 59 |                                         |            |   |        |     |
| 60 |                                         |            |   |        |     |

### Overall reporting quality

Table 2 shows the evaluation of CONSORT checklist items as reported in the 136 RCTs. No abstract reported all 16 items. The best abstract reported 14 of 16, the worst 3 of 16 items. The median number of reported items was 7 (95% CI 7; 8). Comparing the pre- and post-CONSORT periods, abstract reporting improved from median 7 (95% CI 6; 7) to median 8 (95% CI 7; 8) reported items. In total, 104 of 136 abstracts (77%) reported 8 items or less, whereas 32 abstracts stated 9 items or more (23%). Best reported items were “interventions” (95% reported) and “objectives” (98%). The worst reporting was on “outcomes” with 0% (Table 2).

**Table 2**

Adherence of RCTs (N=136) to individual items of the CONSORT checklist for abstracts: declaration of items to be considered in the abstract according to the CONSORT recommendations, evaluation criteria for the respective abstracts, total and relative frequency [%] of abstracts providing information on the respective items according to the evaluation criteria

For peer review only

| Item                              | assessment criteria                                                                                       | absolute and relative frequency of abstracts reporting the item (N = 136) (%) |
|-----------------------------------|-----------------------------------------------------------------------------------------------------------|-------------------------------------------------------------------------------|
| <b>Title</b>                      | declaration of the study as randomised                                                                    | 57 (42%)                                                                      |
| <b>Trial design</b>               | description of the trial design                                                                           | 97 (71%)                                                                      |
| <b>Participants</b>               | eligibility criteria for participants and setting where data was collected                                | 123 (90%)                                                                     |
| <b>Interventions</b>              | description / declaration of interventions intended for each group                                        | 129 (95%)                                                                     |
| <b>Objectives</b>                 | specific objectives or hypotheses                                                                         | 133 (98%)                                                                     |
| <b>Definition primary outcome</b> | explicitly defined primary outcome                                                                        | 95 (70%)                                                                      |
| <b>Randomisation</b>              | information on the allocation scheme of trials participants to interventions                              | 39 (29%)                                                                      |
| <b>Blinding</b>                   | whether or not participants, caregivers and those assessing the outcomes were blinded to group assignment | 59 (43%)                                                                      |
| <b>Numbers randomised</b>         | number of participants randomised to each group (intended sample sizes)                                   | 75 (55%)                                                                      |
| <b>Recruitment</b>                | trial status (actual sample sizes)                                                                        | 12 (9%)                                                                       |
| <b>Numbers analysed</b>           | number of participants analysed for each group (effective sample sizes)                                   | 30 (22%)                                                                      |
| <b>Outcomes</b>                   | fulfilling both criteria as:                                                                              | 0 (0%)                                                                        |
|                                   | – primary outcome for each trial group / trial arm                                                        | 87 (64%)                                                                      |
|                                   | – for primary outcome, effect size and precision (confidence interval) reported (in total)                | 9 (7%)                                                                        |
|                                   | → effect size and precision (confidence interval) for trials with binary outcome, n=41                    | 3 (7%)                                                                        |
|                                   | → effect size and precision (confidence interval) for trials with continuous outcome, n=95                | 6 (6%)                                                                        |
| <b>Harms</b>                      | important adverse events of the results                                                                   | 65 (48%)                                                                      |
| <b>Conclusions</b>                | general interpretation of the results fulfilling both criteria:                                           | 23 (17%)                                                                      |
|                                   | – consistency with the results reported in the abstract                                                   | 130 (96%)                                                                     |

|                           |                                                |          |
|---------------------------|------------------------------------------------|----------|
|                           | – benefits and harms reported                  | 24 (18%) |
| <b>Trial registration</b> | registration number and name of trial register | 26 (19%) |
| <b>Funding</b>            | source of funding                              | 33 (24%) |

### Reporting of “general items”

Only 42% (57/136) identified the presented investigation as randomised in the title. 71% (97/136) described the trial design as required (the information “randomised controlled trial” or “multi-centre / single-centre” were not sufficient). Kappa estimates for these items were 0.89 or above.

### Reporting of “trial methodology”

Eligibility criteria for participants and for interventions – to be documented for each treatment group – were reported in 90% (123/136) and 95% (129/136), respectively. Similarly, the specific objective or hypothesis was mentioned in 98% (133/136). 70% (95/136) reported a clearly defined primary outcome. Only 29% (39/136) of abstracts stated information on randomisation and 43% (59/136) on blinding. Details about trial status were given in 9% (12/136). The inter-observer agreement on reporting methods (participants, interventions, objectives, definition primary outcome, randomisation, blinding) varied with kappa estimates ranging from 0.55 to 0.81.

### Reporting of “results”

Of the 136 abstracts included, 55% (75/136) reported the number of participants randomised to each group, but only 22% (30/136) reported the number of participants analysed for each group. Important adverse events were described in 48% (65/136). As CONSORT recommends three different sub-items for reporting outcomes, this investigation found a total of 64% (87/136) abstracts reporting primary outcome results for each group, but none of the 136 abstracts reported on effect size and confidence interval for the primary outcome in full detail. The proportion of abstracts describing effect size and confidence intervals for primary outcome was 7 % (9/136): 7% (3 out of 41 trials) with binary outcome and 6% (6 out of 95 trials) with continuous outcome. In total, none of the 136 abstracts met both criteria, so the

correct reporting frequency for the “results” indicators was estimated 0%. The respective underlying kappa estimates ranged from 0.51 to 0.85.

#### Reporting of “conclusions”

Information on a trial registration number was found in 19% (26/136) of the abstract, and a possible funding source was referenced in 24% (33/136). Correct interpretations of the results in the “conclusions” section as recommended by CONSORT were available in 17% (23/136): 96 % (130/136) of the abstracts reported adequately and in compliance with the trial results, but only 18% (24/136) commented on both benefits and harms of the trial therapies in the “conclusions” section. Kappa estimates for reporting “conclusions” items ranged from 0.67 to 0.94.

#### Journal characteristics associated with quality of reporting

The multivariate analysis (see Table 3) only demonstrated an effective word count limitation (>250 vs ≤250) as being significantly associated with a better reporting of abstracts (Incidence Rate Ratio (IRR) 1.152, 95% CI 1.010; 1.314). The multiple Poisson regression’s model fit was estimated 15 % (*Nagelkerk’s Pseudo R<sup>2</sup>*). Abstracts with an effective word count of > 250 achieved median 9 fulfilled items, abstracts with ≤ 250 words a median of 8 items. In contrast, journals with IF> 3 and journals with IF<3 showed no difference in median fulfillment (8 items both).

**Table 3**

Results of multivariate analysis (multiple Poisson regression) relating the total number of reported abstract items among 16 CONSORT recommendations per considered RCT publications (n=136) to general characteristics of the underlying journals; associations between violation counts and journal characteristics were quantified via Incidence Rate Ratios (IRR) point estimates and the corresponding un-adjusted two-sided 95% confidence intervals (CI lower and upper bound, respectively); un-adjusted two-sided p-values were derived from Likelihood Ratio tests and indicate locally significant associations in case of p≤ 0.05.

|                                     | IRR   | 95% CI lower | 95% CI upper | p-value |
|-------------------------------------|-------|--------------|--------------|---------|
| publication date<br>[<2008 / ≥2008] | 1.111 | 0.981        | 1.258        | 0.098   |

|                                                 |       |       |       |       |
|-------------------------------------------------|-------|-------|-------|-------|
| <b>journal impact factor [publication year]</b> | 1.002 | 0.994 | 1.009 | 0.645 |
| <b>trial design multicentric [yes / no]</b>     | 1.071 | 0.923 | 1.243 | 0.645 |
| <b>structured abstract [yes / no]</b>           | 1.078 | 0.833 | 1.400 | 0.567 |
| <b>effective sample size [&lt;100 / ≥ 100]</b>  | 1.053 | 0.906 | 1.223 | 0.567 |
| <b>word count limitation [≤250 / &gt;250]</b>   | 1.152 | 1.010 | 1.314 | 0.035 |

## DISCUSSION

In the present study, 136 RCT abstracts concerning the treatment of AMD were identified and assessed. The overall quality of reporting based on the CONSORT for abstracts checklist criteria was with median 7 reported items out of 16 items suboptimal. Only two CONSORT items (“interventions” and “objectives”) were adequately reported in most abstracts (> 90%). However, no abstract provided complete information on outcomes as required. The main problem was found in the reporting of effect size and confidence interval (for each trial arm / group as well as in total). Less than 25% of abstracts included sufficiently reported “recruitment”, “numbers analysed”, “conclusions”, “trial registration” and “funding”. Information on “randomisation” was available in 29% which also implies that reporting was not transparent. In the conclusions section most abstracts (96%) reported conclusions consistent with the results but just a few of them (18%) addressed potential limitations of the study or noted whether additional studies were required due to different reasons.

In particular, none of the 136 abstracts presented sufficient reporting of result outcomes, which demonstrates the crucial need for improvement in this field by, for example, provision of explicit instructions for authors in terms of standard reporting formats. The non-reporting of the effect size and its confidence interval for primary outcome has to be identified as the main problem.

Two further studies of Hua (0% pre- and 2.3% post-CONSORT)[21] and Chen (1%)[10] presented similar results. Other studies showed better but also improvable reporting of outcomes (Bigna 25.2% pre and 42.5% post[3]; Can 5.6-18.4% pre and 20.4-38.8% post, depending on the journal[16]; Berwanger 62.3 % [11]). From our point of view, the abstract is crucial, and therefore the outcomes are essential in an abstract. Strict fulfilment of all criteria



1  
2  
3 as indicated by the CONSORT Statement for abstracts was therefore required by the  
4 authors: primary outcome result for each group and for primary outcome as well as effect  
5 size and confidence interval (CI) reported appropriate for trials with binary outcome resp. with  
6 continuous outcome. In this respect, we have not allowed any scope for interpretation and  
7 the parallel reader evaluation followed a strict “no tolerance strategy”, which might explain  
8 the embarrassing result for this item in our investigation. In addition, in a randomised study  
9 with at least two different therapies, it should be possible to present an effect size between  
10 them.  
11  
12  
13  
14

15 Age-related macular degeneration is a common eye disease with an increasing need for  
16 research in the last years. However, the reporting quality of RCT abstracts concerning AMD  
17 therapy has not been assessed until we conducted our study. Our findings were disillusioning  
18 but consistent with previous studies assessing the quality of reporting of journal RCT  
19 abstracts concerning different diseases: Bigna[3], for example, found in 2016 in 312  
20 abstracts concerning HIV median 6 reported items pre-CONSORT and median 7 items post-  
21 CONSORT, and stated that this suboptimal improvement was associated with the journal’s  
22 high impact factor, large number of authors and non-pharmacological/vaccine intervention in  
23 the trial. Also in 2016, Chhapola found in 891 abstracts in three leading paediatrics  
24 journals[18] median 7 to 8 items (depending on the journal) pre-CONSORT and median 7 to  
25 10 items post-CONSORT. The authors assumed that the reporting quality may be affected  
26 by constraints of space and word limit as well as structured vs. unstructured abstracts.  
27 Ghimire[23] investigated 956 phase III oncology trial abstracts published pre- and post-  
28 CONSORT for abstracts and found median 8.2 (95% CI 8.0, 8.3) and 9.9 (95% CI: 9.7, 10.2)  
29 in the pre- and post-CONSORT periods, respectively. A high impact factor and the journal of  
30 publication were independent factors significantly associated with higher reporting quality on  
31 their multivariate analysis. In our study, the multivariate analysis showed that only the  
32 effective number of words had an influence on the quality of abstracts. Hopewell[5] showed  
33 that with a word limit of 250 to 300 words the checklist items could be easily incorporated.  
34 This was also reflected in our investigation: Abstracts with > 250 words showed better  
35 reporting than abstracts with 250 words or less. It is conceivable that with a word limit of  
36 maximum 250 words medical authors focus on medical aspects and less on methodological  
37 aspects such as randomisation, blindness, trial status, or a correct outcome presentation as  
38 recommended by CONSORT. On the other hand, Berwanger 2009[11] impressively  
39 demonstrated the possibility of expressing maximum information about methodological  
40 aspects in just a few words.  
41  
42  
43  
44  
45  
46  
47  
48  
49  
50  
51  
52  
53

54 In this study, the impact factor of journals or structuring of abstracts did not affect the quality  
55 of reporting in AMD abstracts as was found in other studies. One reason for this could be the  
56  
57  
58

1  
2  
3 inclusion of 36 different journals, in which RCTs concerning AMD were published between  
4 2004 and 2013. We had determined the impact factor (IF) for each journal depending on the  
5 year of publication: Therefore, we had a great variability in the impact factors ranging from 0  
6 to 52.414 and a median IF of 3.125. Most other studies relate to abstracts in pre-selected  
7 journals[11, 16, 10, 18, 12, 14, 17] specialised in the particular disease. These studies refer  
8 to a handful of pre-selected journals with only a few different IFs, which possibly explains this  
9 influence in contrast to our study. Furthermore, only eight journals with nine abstracts  
10 contained unstructured abstracts in this investigation. This could be the reason why an  
11 influence of abstract structure was not demonstrated here. The present investigation also  
12 failed to demonstrate an improvement of quality after publication of the CONSORT extension  
13 for abstracts in 2008. This result is similar to several previous surveys[26, 19, 20, 18],  
14 whereas some other studies using a simple pre-post comparison showed a slight  
15 improvement[16, 23, 14, 3]. Due to the inclusion of all journals without pre-selection and over  
16 a long period of publication, the authors were not able to identify whether the respective  
17 journal made a reference to the CONSORT Statement at the publication time of each RCT,  
18 and especially whether the journal contained a reference to the CONSORT extension for  
19 abstracts. This is certainly a limitation of this investigation which, however, was not  
20 preventable due to a lack of (online) information.  
21  
22  
23  
24  
25  
26  
27  
28  
29

30 Our study shows high process validity from the methodological perspective, as the  
31 identification of RCTs, eligibility decision and data extraction were performed by two  
32 independent readers, both having several years of experience in the publication and  
33 reviewing of clinical trials. In addition, all items were clearly parameterised before the  
34 investigation by means of a standard operation procedure on the CONSORT items'  
35 evaluation, and then discussed and mutually validated by means of these procedures. For  
36 this purpose, a pilot study in a different indication (cataract surgery) was carried out[25] in  
37 order to identify possible weaknesses and interferences in advance. Nevertheless, kappa  
38 values for some items only showed moderate inter-observer reliability. This is partly  
39 explained by the fact that it was difficult – based only on the written information – to decide  
40 whether abstracts contained information on “numbers randomised” or “numbers analysed”.  
41 Only in a few cases both information were presented explicitly. Therefore, the “moderate”  
42 inter-observer reliability in these items was not only based on different ratings, but also on  
43 non-transparent and unclear reporting in the respective abstract.  
44  
45  
46  
47  
48  
49  
50

51 The use of a sensitive PubMed research strategy and the data collection from 2004 to 2013  
52 led to the inclusion of all published RCTs in AMD with no selection of special journals. This  
53 represents the whole body of scientific evidence in the field of age-related macular  
54  
55  
56  
57  
58  
59  
60

1  
2  
3 degeneration. We did not take a random sample of RCTs due to the already manageable  
4 number of published abstracts.  
5

6  
7 An undeniable limitation is that both readers were not blinded to the journal and publication  
8 period so the possibility of assessor bias cannot be ruled out entirely. Furthermore, as in  
9 other studies[11, 3, 16, 10, 18, 14, 17], all 16 CONSORT items were equally weighted and  
10 only the presence of an item was rated as “yes / no”. However, it can be noted that certainly  
11 not all items have the same impact on the transparency of the reporting process, and some  
12 items, e.g. on explicit result presentation, are certainly be more important than others such  
13 as details on funding. Nevertheless, all items of the CONSORT checklist should be reported  
14 in an abstract and a median number of reported items of 7 (95% CI 7; 8) must be considered  
15 as suboptimal reporting quality.  
16  
17  
18  
19

20  
21 In summary, the reporting quality of RCT abstracts on AMD health care showed a  
22 considerable potential for improvement to meet the CONSORT abstract reporting  
23 recommendations. Knowledge of the reporting guidelines and CONSORT checklist should be  
24 mandatory for both authors and reviewers. The author instructions of ophthalmological  
25 journals should consider to explicitly refer to the CONSORT Statement for abstracts in order  
26 to ensure transparent reporting. Furthermore, word count limits for abstracts of 250 were  
27 identified as a significant determinant of the overall abstract reporting quality.  
28  
29  
30  
31  
32  
33  
34  
35

## 36 REFERENCES

- 37  
38 1 Concato J, Shah N, Horwitz RI. Randomized, controlled trials, observational studies, and  
39 the hierarchy of research designs. *N Engl J Med* 2000;342:1887-  
40 92.doi:10.1056/NEJM200006223422507.  
41 2 Stolberg HO, Norman G, Trop I. Randomized controlled trials. *AJR Am J Roentgenol*  
42 2004;183:1539-44.doi:10.2214/ajr.183.6.01831539.  
43 3 Bigna JJ, Noubiap JJ, Asangbeh SL, et al. Abstracts reporting of HIV/AIDS randomized  
44 controlled trials in general medicine and infectious diseases journals: completeness to date  
45 and improvement in the quality since CONSORT extension for abstracts. *BMC Med Res*  
46 *Methodol* 2016;16:138.doi:10.1186/s12874-016-0243-y.  
47 4 The impact of open access upon public health. *PLoS Med*  
48 2006;3:e252.doi:10.1371/journal.pmed.0030252.  
49 5 Hopewell S, Clarke M, Moher D, et al. CONSORT for reporting randomized controlled trials  
50 in journal and conference abstracts: explanation and elaboration. *PLoS Med*  
51 2008;5:e20.doi:10.1371/journal.pmed.0050020.  
52 6 Begg C, Cho M, Eastwood S, et al. Improving the quality of reporting of randomized  
53 controlled trials. The CONSORT statement. *JAMA* 1996;276:637-9  
54 7 Moher D, Schulz KF, Altman DG, et al. The CONSORT statement: revised  
55 recommendations for improving the quality of reports of parallel group randomized trials.  
56 *BMC Med Res Methodol* 2001;1:2  
57  
58  
59

- 1  
2  
3 8 Moher D, Hopewell S, Schulz KF, et al. CONSORT 2010 explanation and elaboration:  
4 updated guidelines for reporting parallel group randomised trials. *BMJ*  
5 2010;340:c869.doi:10.1136/bmj.c869.  
6 9 Schulz KF, Altman DG, Moher D, et al. CONSORT 2010 Statement: updated guidelines for  
7 reporting parallel group randomised trials. *Trials* 2010;11:32.doi:10.1186/1745-6215-11-32.  
8 10 Chen Y, Li J, Ai C, et al. Assessment of the quality of reporting in abstracts of randomized  
9 controlled trials published in five leading Chinese medical journals. *PLoS One*  
10 2010;5:e11926.doi:10.1371/journal.pone.0011926.  
11 11 Berwanger O, Ribeiro RA, Finkelsztejn A, et al. The quality of reporting of trial abstracts is  
12 suboptimal: survey of major general medical journals. *J Clin Epidemiol* 2009;62:387-  
13 92.doi:10.1016/j.jclinepi.2008.05.013.  
14 12 Ghimire S, Kyung E, Kang W, et al. Assessment of adherence to the CONSORT  
15 statement for quality of reports on randomized controlled trial abstracts from four high-impact  
16 general medical journals. *Trials* 2012;13:77.doi:10.1186/1745-6215-13-77.  
17 13 Knobloch K, Vogt PM. Adherence to CONSORT abstract reporting suggestions in surgical  
18 randomized-controlled trials published in *Annals of Surgery*. *Ann Surg* 2011;254:546; author  
19 reply -7.doi:10.1097/SLA.0b013e31822ad829.  
20 14 Mbuagbaw L, Thabane M, Vanniyasingam T, et al. Improvement in the quality of abstracts  
21 in major clinical journals since CONSORT extension for abstracts: a systematic review.  
22 *Contemp Clin Trials* 2014;38:245-50.doi:10.1016/j.cct.2014.05.012.  
23 15 Samaan Z, Mbuagbaw L, Kosa D, et al. A systematic scoping review of adherence to  
24 reporting guidelines in health care literature. *J Multidiscip Healthc* 2013;6:169-  
25 88.doi:10.2147/JMDH.S43952.  
26 16 Can OS, Yilmaz AA, Hasdogan M, et al. Has the quality of abstracts for randomised  
27 controlled trials improved since the release of Consolidated Standards of Reporting Trial  
28 guideline for abstract reporting? A survey of four high-profile anaesthesia journals. *Eur J*  
29 *Anaesthesiol* 2011;28:485-92.doi:10.1097/EJA.0b013e32833fb96f.  
30 17 Wang L, Li Y, Li J, et al. Quality of reporting of trial abstracts needs to be improved: using  
31 the CONSORT for abstracts to assess the four leading Chinese medical journals of  
32 traditional Chinese medicine. *Trials* 2010;11:75.doi:10.1186/1745-6215-11-75.  
33 18 Chhapola V, Tiwari S, Brar R, et al. An interrupted time series analysis showed  
34 suboptimal improvement in reporting quality of trial abstract. *J Clin Epidemiol* 2016;71:11-  
35 7.doi:10.1016/j.jclinepi.2015.10.013.  
36 19 Kiriakou J, Pandis N, Madianos P, et al. Assessing the reporting quality in abstracts of  
37 randomized controlled trials in leading journals of oral implantology. *J Evid Based Dent Pract*  
38 2014;14:9-15.doi:10.1016/j.jebdp.2013.10.018.  
39 20 Seehra J, Wright NS, Polychronopoulou A, et al. Reporting quality of abstracts of  
40 randomized controlled trials published in dental specialty journals. *J Evid Based Dent Pract*  
41 2013;13:1-8.doi:10.1016/j.jebdp.2012.11.001.  
42 21 Hua F, Walsh T, Glenny AM, et al. Reporting quality of randomized controlled trial  
43 abstracts presented at European Orthodontic Society congresses. *Eur J Orthod*  
44 2016;38:584-92.doi:10.1093/ejo/cjv094.  
45 22 Faggion CM, Jr., Giannakopoulos NN. Quality of reporting in abstracts of randomized  
46 controlled trials published in leading journals of periodontology and implant dentistry: a  
47 survey. *J Periodontol* 2012;83:1251-6.doi:10.1902/jop.2012.110609.  
48 23 Ghimire S, Kyung E, Lee H, et al. Oncology trial abstracts showed suboptimal  
49 improvement in reporting: a comparative before-and-after evaluation using CONSORT for  
50 Abstract guidelines. *J Clin Epidemiol* 2014;67:658-66.doi:10.1016/j.jclinepi.2013.10.012.  
51 24 Bressler NM, Bressler SB, Childs AL, et al. Surgery for hemorrhagic choroidal  
52 neovascular lesions of age-related macular degeneration: ophthalmic findings: SST report  
53 no. 13. *Ophthalmology* 2004;111:1993-2006.doi:10.1016/j.ophtha.2004.07.023.  
54 25 Baulig C, Krummenauer F, Knippschild S. [Evaluation of methodological quality in  
55 published RCTs on cataract surgery : Pilot study on the degree of adherence to CONSORT  
56 statement requirements and their qualitative validity]. *Ophthalmologie* 2018;115:40-  
57 6.doi:10.1007/s00347-017-0446-6.  
58  
59  
60

1  
2  
3 26 Blair DA, Hughes PJ, Woolley TW, Jr. Pharmacy journal abstracts published in PubMed  
4 that abide by the CONSolidated Standards Of Reporting Trials (CONSORT) guidelines. *J*  
5 *Med Libr Assoc* 2014;102:110-4.doi:10.3163/1536-5050.102.2.010.  
6  
7  
8  
9

### 10 **Acknowledgment**

11  
12 The authors would like to thank Mrs. Manuela Munk for linguistic support in preparing this  
13 manuscript.  
14

### 15 **Funding**

16  
17  
18 The authors are grateful to the Internal Research Foundation Initiative of the Witten /  
19 Herdecke University's Faculty of Health, which enabled this investigation by means of a  
20 supportive research grant comprising a one-year research position for Dr. Stephanie  
21 Knippschild.  
22  
23  
24  
25  
26

### 27 **Authors' Contributions**

28  
29 Grant application: CB, SK, FK. Study conception and design: CB, SK, FK. Data collection:  
30 CB, SK. Abstract selection: CB, SK. Data extraction: CB; SK. Statistical analysis: FK, BG,  
31 ST. Data interpretation: CB, SK, FK, BG, ST. Drafting: CB. Critical discussion and  
32 manuscript revision: FK, SK. Approval of final version: All authors.  
33  
34  
35  
36  
37

### 38 **Data sharing statement**

39  
40 The data may be obtained from the authors for academic purposes.  
41  
42  
43  
44

45 Figure 1:

46  
47 Flowchart of the literature search and identification of randomized controlled clinical trial  
48 abstracts  
49  
50  
51  
52  
53  
54  
55  
56  
57  
58  
59  
60

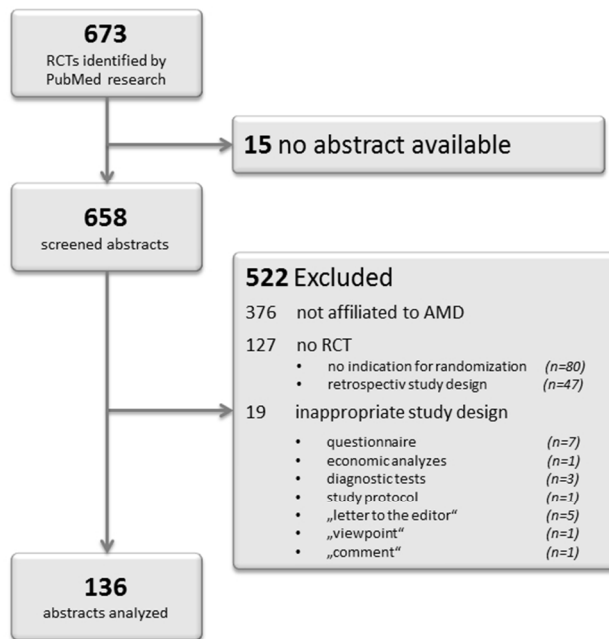

Flowchart of the literature search and identification of randomized controlled clinical trial abstracts

81x60mm (300 x 300 DPI)

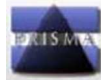

# PRISMA 2009 Checklist

| Section/topic                      | #  | Checklist item                                                                                                                                                                                                                                                                                              | Reported on page # |
|------------------------------------|----|-------------------------------------------------------------------------------------------------------------------------------------------------------------------------------------------------------------------------------------------------------------------------------------------------------------|--------------------|
| <b>TITLE</b>                       |    |                                                                                                                                                                                                                                                                                                             |                    |
| Title                              | 1  | Identify the report as a systematic review, meta-analysis, or both.                                                                                                                                                                                                                                         | 1                  |
| <b>ABSTRACT</b>                    |    |                                                                                                                                                                                                                                                                                                             |                    |
| Structured summary                 | 2  | Provide a structured summary including, as applicable: background; objectives; data sources; study eligibility criteria, participants, and interventions; study appraisal and synthesis methods; results; limitations; conclusions and implications of key findings; systematic review registration number. | 2                  |
| <b>INTRODUCTION</b>                |    |                                                                                                                                                                                                                                                                                                             |                    |
| Rationale                          | 3  | Describe the rationale for the review in the context of what is already known.                                                                                                                                                                                                                              | 4                  |
| Objectives                         | 4  | Provide an explicit statement of questions being addressed with reference to participants, interventions, comparisons, outcomes, and study design (PICOS).                                                                                                                                                  | 4                  |
| <b>METHODS</b>                     |    |                                                                                                                                                                                                                                                                                                             |                    |
| Protocol and registration          | 5  | Indicate if a review protocol exists, if and where it can be accessed (e.g., Web address), and, if available, provide registration information including registration number.                                                                                                                               | -                  |
| Eligibility criteria               | 6  | Specify study characteristics (e.g., PICOS, length of follow-up) and report characteristics (e.g., years considered, language, publication status) used as criteria for eligibility, giving rationale.                                                                                                      | 5                  |
| Information sources                | 7  | Describe all information sources (e.g., databases with dates of coverage, contact with study authors to identify additional studies) in the search and date last searched.                                                                                                                                  | 5                  |
| Search                             | 8  | Present full electronic search strategy for at least one database, including any limits used, such that it could be repeated.                                                                                                                                                                               | 5                  |
| Study selection                    | 9  | State the process for selecting studies (i.e., screening, eligibility, included in systematic review, and, if applicable, included in the meta-analysis).                                                                                                                                                   | 5                  |
| Data collection process            | 10 | Describe method of data extraction from reports (e.g., piloted forms, independently, in duplicate) and any processes for obtaining and confirming data from investigators.                                                                                                                                  | 6                  |
| Data items                         | 11 | List and define all variables for which data were sought (e.g., PICOS, funding sources) and any assumptions and simplifications made.                                                                                                                                                                       | 6                  |
| Risk of bias in individual studies | 12 | Describe methods used for assessing risk of bias of individual studies (including specification of whether this was done at the study or outcome level), and how this information is to be used in any data synthesis.                                                                                      | 3                  |
| Summary measures                   | 13 | State the principal summary measures (e.g., risk ratio, difference in means).                                                                                                                                                                                                                               | 6                  |
| Synthesis of results               | 14 | Describe the methods of handling data and combining results of studies, if done, including measures of consistency (e.g., $I^2$ ) for each meta-analysis.                                                                                                                                                   | 6                  |

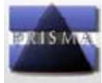

# PRISMA 2009 Checklist

Page 1 of 2

| Section/topic                 | #  | Checklist item                                                                                                                                                                                           | Reported on page # |
|-------------------------------|----|----------------------------------------------------------------------------------------------------------------------------------------------------------------------------------------------------------|--------------------|
| Risk of bias across studies   | 15 | Specify any assessment of risk of bias that may affect the cumulative evidence (e.g., publication bias, selective reporting within studies).                                                             | --                 |
| Additional analyses           | 16 | Describe methods of additional analyses (e.g., sensitivity or subgroup analyses, meta-regression), if done, indicating which were pre-specified.                                                         | 7                  |
| <b>RESULTS</b>                |    |                                                                                                                                                                                                          |                    |
| Study selection               | 17 | Give numbers of studies screened, assessed for eligibility, and included in the review, with reasons for exclusions at each stage, ideally with a flow diagram.                                          | 7                  |
| Study characteristics         | 18 | For each study, present characteristics for which data were extracted (e.g., study size, PICOS, follow-up period) and provide the citations.                                                             | 8                  |
| Risk of bias within studies   | 19 | Present data on risk of bias of each study and, if available, any outcome level assessment (see item 12).                                                                                                | --                 |
| Results of individual studies | 20 | For all outcomes considered (benefits or harms), present, for each study: (a) simple summary data for each intervention group (b) effect estimates and confidence intervals, ideally with a forest plot. | 8-13               |
| Synthesis of results          | 21 | Present results of each meta-analysis done, including confidence intervals and measures of consistency.                                                                                                  | 13                 |
| Risk of bias across studies   | 22 | Present results of any assessment of risk of bias across studies (see Item 15).                                                                                                                          | --                 |
| Additional analysis           | 23 | Give results of additional analyses, if done (e.g., sensitivity or subgroup analyses, meta-regression [see Item 16]).                                                                                    | 13                 |
| <b>DISCUSSION</b>             |    |                                                                                                                                                                                                          |                    |
| Summary of evidence           | 24 | Summarize the main findings including the strength of evidence for each main outcome; consider their relevance to key groups (e.g., healthcare providers, users, and policy makers).                     | 14-15              |
| Limitations                   | 25 | Discuss limitations at study and outcome level (e.g., risk of bias), and at review-level (e.g., incomplete retrieval of identified research, reporting bias).                                            | 16-17              |
| Conclusions                   | 26 | Provide a general interpretation of the results in the context of other evidence, and implications for future research.                                                                                  | 17                 |
| <b>FUNDING</b>                |    |                                                                                                                                                                                                          |                    |
| Funding                       | 27 | Describe sources of funding for the systematic review and other support (e.g., supply of data); role of funders for the systematic review.                                                               | 19/3               |

From: Moher D, Liberati A, Tetzlaff J, Altman DG, The PRISMA Group (2009). Preferred Reporting Items for Systematic Reviews and Meta-Analyses: The PRISMA Statement. PLoS Med 6(6): e1000097. doi:10.1371/journal.pmed1000097

For more information, visit: [www.prisma-statement.org](http://www.prisma-statement.org).

Page 2 of 2

For peer review only - <http://bmjopen.bmj.com/site/about/guidelines.xhtml>



# BMJ Open

## Reporting Quality of Randomised Controlled Trial Abstracts on Age-Related Macular Degeneration Health Care – A Cross Sectional Quantification of the Adherence to CONSORT Abstract Reporting Recommendations

|                                 |                                                                                                                                                                                                                                                                                                                                                                                                                                                                                                                                                                                                                                  |
|---------------------------------|----------------------------------------------------------------------------------------------------------------------------------------------------------------------------------------------------------------------------------------------------------------------------------------------------------------------------------------------------------------------------------------------------------------------------------------------------------------------------------------------------------------------------------------------------------------------------------------------------------------------------------|
| Journal:                        | <i>BMJ Open</i>                                                                                                                                                                                                                                                                                                                                                                                                                                                                                                                                                                                                                  |
| Manuscript ID                   | bmjopen-2018-021912.R1                                                                                                                                                                                                                                                                                                                                                                                                                                                                                                                                                                                                           |
| Article Type:                   | Research                                                                                                                                                                                                                                                                                                                                                                                                                                                                                                                                                                                                                         |
| Date Submitted by the Author:   | 12-Mar-2018                                                                                                                                                                                                                                                                                                                                                                                                                                                                                                                                                                                                                      |
| Complete List of Authors:       | Baulig, Christine; Institute for Medical Biometry and Epidemiology, Witten/Herdecke University , Department of Medicine<br>Krummenauer, Frank; Institute for Medical Biometry and Epidemiology, Witten/Herdecke University , Department of Medicine<br>Geis, Berit; Institute for Medical Biometry and Epidemiology, Witten/Herdecke University , Department of Medicine<br>Tulka, Sabrina; Institute for Medical Biometry and Epidemiology, Witten/Herdecke University , Department of Medicine<br>Knippschild, Stephanie; Institute for Medical Biometry and Epidemiology, Witten/Herdecke University, Departement of Medicine |
| <b>Primary Subject Heading</b>: | Ophthalmology                                                                                                                                                                                                                                                                                                                                                                                                                                                                                                                                                                                                                    |
| Secondary Subject Heading:      | Epidemiology                                                                                                                                                                                                                                                                                                                                                                                                                                                                                                                                                                                                                     |
| Keywords:                       | reporting quality, Abstract, randomized controlled trial, CONSORT, age related macula degeneration                                                                                                                                                                                                                                                                                                                                                                                                                                                                                                                               |
|                                 |                                                                                                                                                                                                                                                                                                                                                                                                                                                                                                                                                                                                                                  |

SCHOLARONE™  
Manuscripts

1  
2  
3 **Reporting quality of Randomised Controlled Trial Abstracts on Age-Related Macular**  
4 **Degeneration Health Care – A Cross Sectional Quantification of the Adherence to**  
5 **CONSORT Abstract Reporting Recommendations**  
6  
7

8  
9 Christine Baulig, Frank Krummenauer, Berit Geis, Sabrina Tulka, Stephanie Knippschild  
10

11  
12 Corresponding author:

13 JProf Christine Baulig MSc  
14 Institute for Medical Biometry and Epidemiology  
15 Faculty of Health, Witten/Herdecke University  
16 Alfred-Herrhausen-Straße 50  
17 58448 Witten, Germany  
18 Phone: +49 (0)2302 926 782  
19 E-mail: Christine.Baulig@uni-wh.de  
20  
21

22  
23 Co-Authors:

24  
25 Prof Dr Frank Krummenauer  
26 Institute for Medical Biometry and Epidemiology  
27 Faculty of Health, Witten/Herdecke University  
28 Alfred-Herrhausen-Straße 50  
29 58448 Witten, Germany  
30

31 MSc Berit Geis  
32 Institute for Medical Biometry and Epidemiology  
33 Faculty of Health, Witten/Herdecke University  
34 Alfred-Herrhausen-Straße 50  
35 58448 Witten, Germany  
36  
37

38 MSc Sabrina Tulka  
39 Institute for Medical Biometry and Epidemiology  
40 Faculty of Health, Witten/Herdecke University  
41 Alfred-Herrhausen-Straße 50  
42 58448 Witten, Germany  
43

44 Dr Stephanie Knippschild  
45 Institute for Medical Biometry and Epidemiology  
46 Faculty of Health, Witten/Herdecke University  
47 Alfred-Herrhausen-Straße 50  
48 58448 Witten, Germany  
49  
50

51  
52  
53 **Word count: 4.154**  
54  
55  
56  
57  
58  
59  
60

1  
2  
3 Objective: To assess the reporting quality of RCT abstracts on AMD health care, to evaluate  
4 the adherence to the CONSORT statement's recommendations on minimum abstract  
5 information and to identify journal characteristics associated with abstract reporting quality.  
6  
7

8 Design: Cross-sectional evaluation of RCT abstracts on AMD health care  
9

10 Methods: A PubMed search was implemented to identify RCT abstracts on AMD health care  
11 published in English language between 01/2004 and 12/2013. Data extraction was  
12 performed by two parallel readers independently by means of a documentation format in  
13 accordance with the 16 items of the CONSORT checklist for abstracts. The total number of  
14 criteria fulfilled by an abstract was derived as primary endpoint of the investigation, incidence  
15 rate ratios (IRRs) with un-adjusted 95% confidence intervals (95% CI) were estimated by  
16 means of multiple Poisson regression to identify journal and article characteristics  
17 (publication year, multicentre design, structured abstract recommendations, effective sample  
18 size, effective abstract word counts and journal impact factor) possibly associated with the  
19 total number of fulfilled items.  
20  
21  
22  
23  
24

25 Study characteristics: 136 of 673 identified abstracts (published in 36 different journals)  
26 fulfilled all eligibility criteria.  
27  
28

29 Results: The median number of fulfilled items was 7 (95% CI 7; 8). No abstract reported all  
30 16 recommended items; the maximum total number was 14, the minimum 3 of 16 items.  
31 Multivariate analysis only demonstrated the abstracts' word counts as being significantly  
32 associated with a better reporting of abstracts (Poisson regression based Incidence Rate  
33 Ratio 1.002, 95% CI 1.001; 1.003).  
34  
35  
36  
37

38 Conclusions: Reporting quality of RCT abstracts on AMD investigations showed a  
39 considerable potential for improvement to meet the CONSORT abstract reporting  
40 recommendations. Furthermore, word counts of abstracts were identified as significantly  
41 associated with the overall abstract reporting quality.  
42  
43

44 Key Words: RCT, structured abstract, CONSORT statement, reporting quality  
45  
46  
47  
48  
49  
50  
51  
52  
53  
54  
55  
56  
57  
58  
59  
60

### Strengths and limitations of this study

- Reporting quality of RCT abstracts on AMD therapy has not been assessed so far.
- The cross-sectional inclusion of all published RCT abstracts on AMD health care without selection of journals ensures maximum possible representativeness.
- Data extraction and evaluation were performed by two independent readers with long-term experience in clinical trial methodology and reporting bias evaluation.
  
- The readers were not blinded to the journal and publication period, so that the possibility of reader bias cannot be ruled out entirely.
- Journal characteristics could only be considered as far as published by the journals; the individual reviewing processes underlying the 136 abstracts might have taken additional influence on the actual abstract presentations.

**Funding:** This work was supported by the Internal Research Foundation Initiative of the Witten / Herdecke University's Faculty of Health, comprising a one-year research position for SK (grant number IFF 2016-001).

### Competing interests

The authors declare that they have no competing interests. From the perspective of Good Scientific Practice the authors state, that parts of this manuscript will be presented orally and by means of a congress abstract to be submitted to the 2018 annual meeting of the German Ophthalmic Surgeons (DOC congress, Nuremberg, June 2018).

## INTRODUCTION

Randomised controlled trials (RCT) are considered as optimum origin of evidence and have the highest grade of research designs[1, 2]. Frequently, readers of articles reporting on RCT start by screening the content of the abstract first, which subsequently guides the decision whether or not to obtain and read the entire article[3]. In addition to an overwhelming day-to-day workload, a steadily increasing number of publications and limited access to many full-text articles enforce health care providers to build their health care decisions on information in abstracts[4]. Thus, abstracts of RCTs should contain accurate and clear information about implementation, evaluation, findings and synopsis of the clinical trial[5].

Regarding the methodological details, there was no standardised reporting requirement before the Consolidated Standards of Reporting Trials (CONSORT) were established in 1996[6] and revised in 2001[7] and 2010[8, 9], respectively. In order to prevent discrepancies between full-text articles and abstracts, as well as to improve the reporting quality of abstracts, an extension to the CONSORT Statement was published in 2008[5]. This statement contains 17 items comprising eight sections: title, authors' details (specific to conference abstracts), trial design, methods (including participants, interventions, objectives, defined primary outcome, randomisation, blinding), results (numbers randomised, recruitment, numbers analysed, outcomes, harms), conclusions, trial registration and declaration of funding[5]. This enumeration "provides a minimum list of essential items, that authors should consider when reporting the main results of a randomized trial in any journal or conference abstract"[5].

Several studies have been conducted to evaluate the quality of abstract reporting in general medical journals[10-14] or specific fields of medicine such as health care[15], anaesthesia[16], traditional Chinese medicine[17], HIV/AIDS[3], paediatrics[18], dentistry[19-22] and oncology[23]. These studies thoroughly demonstrated, that there is still a need for optimisation in the reporting of RCT abstracts.

To our knowledge, the reporting quality of RCT abstracts in the field of ophthalmology and especially regarding the treatment of age-related macular degeneration (AMD) has not been assessed yet. AMD is a common eye disease and the leading cause for vision loss among people 50 years of age and older [24], having led to increasing research need on therapeutic concepts and thereby to an increasing number of RCTs on AMD during the past decade. Therefore, the objectives of the present cross-sectional complete census were to assess the reporting quality of RCT abstracts in AMD health care, to evaluate the adherence to the

1  
2  
3 CONSORT statement's recommendations on minimum abstract information and to identify  
4 journal characteristics associated with this parameterisation of abstract reporting quality.  
5  
6  
7

## 8 METHODS

### 9 Study design

10  
11  
12 A cross-sectional evaluation of RCT abstracts on AMD health care published between 2004  
13 and 2013 was implemented; to identify eligible RCT publication abstracts, a systematic  
14 review of abstracts was performed without any restrictions (implying a complete census of all  
15 published abstracts), according to the PRISMA reporting guidance (see online  
16 supplementary material for PRISMA checklist). Human subjects were not involved in this  
17 study.  
18  
19  
20  
21  
22  
23

### 24 Data sources and search strategy

25  
26  
27 A MEDLINE / PubMed search for all RCTs published between 2004 and 2013 was  
28 performed. The search strategy used the MeSH terms "randomised controlled trial" as  
29 publication type and "macular degeneration" as term in title / abstract and was limited to the  
30 publication date (2004/01/01 to 2013/12/31) as well as to English as publication language.  
31 The publication period was limited in order to reflect the period five years before and after the  
32 publication of the extension of CONSORT in 2008. The search was carried out on  
33 2015/09/24 as can be reproduced by online audit trail documentation (supplementary  
34 material).  
35  
36  
37  
38  
39  
40  
41

### 42 Study selection

43  
44 Only abstracts reporting on age-related macular degeneration (AMD) health care were  
45 considered and then investigated for indications of an underlying RCT design: we included  
46 abstracts in which the allocation of participants to interventions was described by the words  
47 "random", "randomly", "randomised", "randomisation" or any other terminology suggesting  
48 that the participants were randomly distributed to treatment arms. Reports not associated  
49 with AMD therapy, without reference to randomisation or an obviously retrospective study  
50 design, economic analyses, diagnostic or screening tests, questionnaire reporting, study  
51 protocols, observational studies, editorials or letters were excluded as well as reviews, meta-  
52 analyses and non-human studies. Two parallel reviewers (CB, SK) independently selected  
53  
54  
55  
56  
57  
58  
59  
60

1  
2  
3 the abstracts; disagreement about which abstracts had to be included was resolved by  
4 discussion and consensus, reasons for article exclusion were documented.  
5

#### 6 Patient and Public involvement 7

8  
9 The present work does not include original patient data but is based on the evaluation of  
10 published abstracts of RCTs in ophthalmological journals. Therefore no patients or public  
11 were involved in this study.  
12

#### 13 Data extraction 14

15  
16 A pilot study was performed with randomly selected abstracts concerning cataract surgery to  
17 identify problems and solve discrepancies in data collection and analysis[25]. The data  
18 extraction was performed in the same way (CB, SK) using the previously created and  
19 pretested data extraction and documentation form in accordance to the items of the  
20 CONSORT checklist for abstracts[5]. Each item had a “yes”/“no” rating indicating whether the  
21 authors had reported this item or not. Only the “authors’ details” item concerning contact  
22 details of the corresponding authors was excluded from the assessment, since this item is  
23 specific to conference abstracts. For the “outcomes” item two sub-items were evaluated – as  
24 required by the CONSORT Statement: 1) primary outcome result presented for each group /  
25 arm, 2) for primary outcome, effect size reported for trials with binary outcome resp. with  
26 continuous outcome and the precision of this effect size (confidence interval (CI)). Only if  
27 both criteria were met, a correct reporting of the outcome results items was ascertained. For  
28 the “conclusions” item also two sub-items had to be reported: 1) consistency with the  
29 reported results and 2) discussion of benefits of and harms from the intervention. Again, only  
30 if both sub-items were reported, the correct reporting of “conclusions” was ascertained.  
31  
32  
33  
34  
35  
36  
37  
38

39 Furthermore, the following information on journal and article characteristics were collected:  
40 name of the journal, name of first author, year of publication, multicentre design [yes/no],  
41 abstract format pre-specified as structured [yes/no], effective sample size, impact factor of  
42 each journal according to the respective publication year. Due to the fact that word count  
43 limits in instructions for authors were found to show severe deviations from the number of  
44 words actually used in the abstract, both counts were recorded (word count limitation (status  
45 2017) as well as actual word count in the abstract). In addition, since only the current word  
46 count specifications of each journal could be found (status 2017), the actual word counts for  
47 each abstract were used for exploratory evaluations (see below).  
48  
49  
50  
51  
52  
53  
54

#### 55 Primary Endpoint 56 57 58 59 60

1  
2  
3 The abstract-wise primary endpoint of this investigation was the total absolute number of  
4 items (among all 16 considered) reported in the respective abstract. To provide maximum  
5 scientific evidence we decided to evaluate all existing abstracts (N = 136) and did not draw a  
6 random sample, thereby providing a complete census of all available abstracts.  
7  
8  
9

### 10 11 12 Exploratory Analysis

13  
14 Descriptive analysis of the primary endpoint was based on medians and quartiles, graphical  
15 presentation on box whisker plots, accordingly. For each CONSORT abstract item Cohen's  
16 kappa (point estimate and one-sided 95% confidence interval) were derived to assess the  
17 parallel readers' agreement, respectively. A kappa point estimate of 0.60 or higher was  
18 considered as an indication for substantial inter-observer agreement in the evaluation of the  
19 respective item.  
20  
21  
22  
23  
24  
25

### 26 27 Multivariate Analysis

28 Incidence rate ratios (IRRs) with 95% confidence intervals (95% CI, not adjusted for  
29 multiplicity with regard to the exploratory character of the multivariate analysis) were  
30 estimated by means of multiple Poisson regression to identify journal and article  
31 characteristics (publication year, multicentre design, structured abstract recommendations,  
32 effective sample size, effective abstract word counts and journal impact factor) possibly  
33 associated with the total number of fulfilled criteria. Poisson regression modelling was  
34 performed by backward variable selection via the AIC criterion, considering Likelihood Ratio  
35 test p-values < 0.05 as indicators of local statistical significance (i.e. model exploration  
36 results were not formally adjusted for multiplicity). The multivariate analysis was conducted  
37 using "R" version 3.4.0 (R Core Team, 2017).  
38  
39  
40  
41  
42  
43  
44  
45

## 46 47 RESULTS

48 Out of 673 identified study publications 537 had to be excluded (Figure 1). In summary, a  
49 total of 136 abstracts fulfilling the eligibility criteria were included in the investigation.  
50  
51  
52  
53

### 54 55 Characteristics of included abstracts and underlying journals

56  
57  
58  
59  
60



The search yielded 136 abstracts of which 55 (40%) were published between 2004 and 2008 (pre-CONSORT) and 81 (n=60%) between 2009 and 2013 (post-CONSORT). The abstracts were published in 36 different journals, of which only two (publishing four articles) had no Thomson & Reuter impact factor. The median impact factor of all journals – according to the respective publication year – was 3.125 (interquartile range Q1 2.367; Q3 5.127). Only seven studies (5%) were published in journals with an impact factor of 10 or higher. Most of the publications (32%) were found in “Ophthalmology” (43/136) followed by “British Journal of Ophthalmology” 10% (13/136) and “Retina” 9% (12/136) (Table 1).

Only one journal did not state word count limits for abstracts in the instructions for authors (status 2017). All other 35 journals limited the words in abstracts to a total number between 200 and 500 words (see Table 1). The actual number of words in abstracts varied between 141 (minimum) and 457 (maximum) with a median of 273 words. 70 (51%) studies were single-centre trials with a minimum sample size of 7 participants up to 300 participants (median 46, Q1 28; Q3 100), and 66 (49%) studies were multi-centre trials with a minimum sample size of 25 participants up to 2457 participants (median 223, Q1 117; Q3 494).

**Table 1**

Listings of journals with at least one AMD RCT abstract considered in the evaluation, total number of publications (N) with abstracts evaluation from the respective journal as well as relative frequency [%] of these abstracts among all abstracts considered in this investigation, 5-years impact factor (Thomson & Reuter, 2016), as well as information on word count limits according to the published instructions for authors of the respective journals (status 2017).

| <b>Journal</b><br><i>(Journal Title Abbreviation)</i> | <b>N</b> | <b>proportion</b><br><i>(%)</i> | <b>5-years IF</b><br><i>(2016)</i> | <b>word count</b><br><b>limits</b> <i>(words)</i> |
|-------------------------------------------------------|----------|---------------------------------|------------------------------------|---------------------------------------------------|
| Am J Ophthalmol                                       | 9        | 7                               | 4.797                              | 250                                               |
| Ophthalmology                                         | 43       | 32                              | 7.788                              | 350                                               |
| Graefes Arch Clin Exp Ophthalmol                      | 4        | 3                               | 2.274                              | 250                                               |
| Br J Nutr                                             | 1        | 1                               | 3.784                              | 250                                               |
| Clin Hemorheol Microcirc                              | 1        | 1                               | 1.647                              | 200                                               |
| Atheroscler Suppl                                     | 1        | 1                               | 3.310                              | 250                                               |
| N Engl J Med                                          | 4        | 3                               | 64.201                             | 250                                               |
| Retina                                                | 12       | 9                               | 3.779                              | 200                                               |
| Arch Ophthalmol                                       | 5        | 4                               | 4.372                              | 350                                               |
| Br J Ophthalmol                                       | 13       | 10                              | 3.466                              | 250                                               |

|    |                                         |            |   |        |     |
|----|-----------------------------------------|------------|---|--------|-----|
| 1  |                                         |            |   |        |     |
| 2  |                                         |            |   |        |     |
| 3  | Scand J Occup Ther                      | 1          | 1 | 1.561  | 200 |
| 4  | Acta Ophthalmologica                    | 7          | 5 | 2.812  | 250 |
| 5  | Eye (Lond)                              | 5          | 4 | 2.547  | 250 |
| 6  | Nutrients                               | 1          | 1 | 4.187  | 200 |
| 7  | PLoS One                                | 1          | 1 | 3.394  | 300 |
| 8  | Nutrition                               | 2          | 2 | 3.312  | 250 |
| 9  | Curr Med Res Opin                       | 1          | 1 | 2.605  | 250 |
| 10 | Invest Ophthalmol Vis Sci               | 4          | 3 | 3.786  | 250 |
| 11 | Clin Rehabil                            | 1          | 1 | 3.026  | 250 |
| 12 | Trans Am Ophthalmol Soc                 | 1          | 1 | 0.000  | 250 |
| 13 | Optometry                               | 3          | 2 | 0.000  | 250 |
| 14 | Biomedical Papers                       | 1          | 1 | 1.160  | 250 |
| 15 | J Clin Neurosci                         | 1          | 1 | 1.545  | 250 |
| 16 | BMJ                                     | 1          | 1 | 19.355 |     |
| 17 | Proc Natl Acad Sci U S A                | 1          | 1 | 10.414 | 250 |
| 18 | JAMA Ophthalmol                         | 1          | 1 | 5.425  | 350 |
| 19 | Eur J Ophthalmol                        | 1          | 1 | 1.161  | 250 |
| 20 | Complementary and Alternative Medicines | 1          | 1 | 2.644  | 300 |
| 21 | BMC Ophthalmology                       | 1          | 1 | 1.579  | 350 |
| 22 | Experimental Eye Research               | 2          | 2 | 3.235  | 500 |
| 23 | Current Eye Research                    | 2          | 2 | 1.947  | 300 |
| 24 | Annals of Nutrition and Metabolism      | 1          | 1 | 2.883  | 250 |
| 25 | Lancet                                  | 1          | 1 | 48.082 | 300 |
| 26 | Ophthalmologica                         | 1          | 1 | 1.918  | 250 |
| 27 | J Ocul Pharmacol Ther                   | 1          | 1 | 1.726  | 250 |
| 28 | <b>Total</b>                            | <b>136</b> |   |        |     |
| 29 |                                         |            |   |        |     |
| 30 |                                         |            |   |        |     |
| 31 |                                         |            |   |        |     |
| 32 |                                         |            |   |        |     |
| 33 |                                         |            |   |        |     |
| 34 |                                         |            |   |        |     |
| 35 |                                         |            |   |        |     |
| 36 |                                         |            |   |        |     |
| 37 |                                         |            |   |        |     |
| 38 |                                         |            |   |        |     |
| 39 |                                         |            |   |        |     |
| 40 |                                         |            |   |        |     |
| 41 |                                         |            |   |        |     |
| 42 |                                         |            |   |        |     |
| 43 |                                         |            |   |        |     |
| 44 |                                         |            |   |        |     |
| 45 |                                         |            |   |        |     |
| 46 |                                         |            |   |        |     |
| 47 |                                         |            |   |        |     |
| 48 |                                         |            |   |        |     |
| 49 |                                         |            |   |        |     |
| 50 |                                         |            |   |        |     |
| 51 |                                         |            |   |        |     |
| 52 |                                         |            |   |        |     |
| 53 |                                         |            |   |        |     |
| 54 |                                         |            |   |        |     |
| 55 |                                         |            |   |        |     |
| 56 |                                         |            |   |        |     |
| 57 |                                         |            |   |        |     |
| 58 |                                         |            |   |        |     |
| 59 |                                         |            |   |        |     |
| 60 |                                         |            |   |        |     |

### Overall reporting quality

None of the 136 abstracts reported all 16 items. The best abstract reported 14 of 16, the worst 3 of 16 items. The median number of reported items was 7 (95% CI 7; 8). Comparing the pre- and post-CONSORT periods, abstract reporting improved from median 7 (95% CI 6; 7) to median 8 (95% CI 7; 8) reported items. In total, 104 of 136 abstracts (77%) reported 8 items or less, whereas 32 abstracts stated 9 items or more (23%). Best reported items were “interventions” (95% reported) and “objectives” (98%). The worst reporting was on “outcomes” with 0% (see Table S, supplementary material).

### Reporting of “general items”

Only 42% (57/136) identified the presented investigation as randomised in the title. 71% (97/136) described the trial design as required (the information “randomised controlled trial” or “multi-centre / single-centre” were not sufficient).

### Reporting of “trial methodology”

Eligibility criteria for participants and for interventions – to be documented for each treatment group – were reported in 90% (123/136) and 95% (129/136), respectively. Similarly, the specific objective or hypothesis was mentioned in 98% (133/136). 70% (95/136) reported a clearly defined primary outcome. Only 29% (39/136) of abstracts stated information on randomisation and 43% (59/136) on blinding. Details about trial status were given in 9% (12/136).

### Reporting of “results”

Of the 136 abstracts included, 55% (75/136) reported the number of participants randomised to each group, but only 22% (30/136) reported the number of participants analysed for each group. Important adverse events were described in 48% (65/136). As CONSORT recommends three different sub-items for reporting outcomes, this investigation found a total of 64% (87/136) abstracts reporting primary outcome results for each group, but none of the 136 abstracts reported on effect size and confidence interval for the primary outcome in full detail. The proportion of abstracts describing effect size and confidence intervals for primary outcome was 7% (9/136), among which 7% (3 out of 41 trials) with binary outcome and 6% (6 out of 95 trials) with continuous outcome. In total, none of the 136 abstracts met both criteria, so the correct reporting frequency for the “results” indicators was estimated 0%.

### Reporting of “conclusions”

Information on a trial registration number was found in 19% (26/136) of the abstract, and a possible funding source was referenced in 24% (33/136). Correct interpretations of the results in the “conclusions” section as recommended by CONSORT were available in 17% (23/136): 96 % (130/136) of the abstracts reported adequately and in compliance with the trial results, but only 18% (24/136) commented on both benefits and harms of the trial therapies in the “conclusions” section.

### Agreement among parallel readers

Table 2 shows the inter-observer agreement for each item [Cohen's kappa and one-sided 95% confidence intervals]. Substantial agreement was found for almost all items under consideration. Notable less in agreement as indicated by kappa point estimates  $< 0.6$  were only found for the items “randomisation”, “numbers randomised” and “recruitment”.

**Table 2**

Item-wise inter-observer agreement [Cohen's kappa, asymptotic one-sided 95% confidence intervals] for 16 abstract reporting items as recommended by the CONSORT statement: kappa point estimates  $> 0.60$  were considered as indicators of substantial parallel reader agreement

| item                          | Kappa point and one-sided 95% confidence interval estimates for inter-observer agreement | Kappa $> 0.60$ (substantial agreement) |
|-------------------------------|------------------------------------------------------------------------------------------|----------------------------------------|
| title                         | 0.91; $\geq 0.84$                                                                        | *                                      |
| authors *                     | -                                                                                        |                                        |
| trial design                  | 0.89; $\geq 0.81$                                                                        | *                                      |
| <b>Methods</b>                |                                                                                          |                                        |
| participants                  | 0.76; $\geq 0.58$                                                                        | *                                      |
| interventions                 | 0.79; $\geq 0.56$                                                                        | *                                      |
| objectives                    | 0.74; $\geq 0.40$                                                                        | *                                      |
| definition of primary outcome | 0.63; $\geq 0.49$                                                                        | *                                      |
| randomisation                 | 0.55; $\geq 0.42$                                                                        |                                        |
| blinding (masking)            | 0.81; $\geq 0.71$                                                                        | *                                      |
| <b>Results</b>                |                                                                                          |                                        |
| numbers randomised            | 0.56; $\geq 0.42$                                                                        |                                        |
| recruitment                   | 0.51; $\geq 0.24$                                                                        |                                        |
| numbers analysed              | 0.65; $\geq 0.51$                                                                        | *                                      |
| outcomes                      | 1.00; $\geq 0.99$                                                                        | *                                      |
| harms                         | 0.85; $\geq 0.76$                                                                        | *                                      |
| conclusions                   | 0.69; $\geq 0.54$                                                                        | *                                      |
| trial registration            | 0.84; $\geq 0.72$                                                                        | *                                      |
| funding                       | 0.94; $\geq 0.87$                                                                        | *                                      |

### Journal characteristics associated with quality of reporting

The multivariate analysis (see Table 3) only demonstrated the abstracts' effective word counts as being significantly associated with a better reporting of abstracts (Incidence Rate Ratio (IRR) 1.002, 95% CI 1.001; 1.003). As could be expected, the latter indicates a proportional benefit of abstracts with increasing abstract text length. The multiple Poisson

1  
2  
3 regression's model fit was, however, estimated only 11 % (*Nagelkerk's Pseudo R<sup>2</sup>*) even  
4 after extensive exploratory sensitivity analyses (introducing interaction terms for the  
5 explanatory variables under consideration as well as introducing these variables as  
6 continuous and binary into the models, respectively).  
7  
8  
9

10  
11 **Table 3**

12  
13 Results of multivariate analysis (multiple Poisson regression) relating the total number of  
14 reported abstract items among 16 CONSORT recommendations per considered RCT  
15 publications (n=136) to general characteristics of the underlying journals; associations  
16 between violation counts and journal characteristics were quantified via Incidence Rate  
17 Ratios (IRR) point estimates and the corresponding un-adjusted two-sided 95% confidence  
18 intervals (CI lower and upper bound, respectively); un-adjusted two-sided p-values were  
19 derived from Likelihood Ratio tests and indicate locally significant associations in case of  $p \leq$   
20 0.05.  
21  
22  
23

|                                            | IRR   | 95% CI lower | 95% CI upper | p-value      |
|--------------------------------------------|-------|--------------|--------------|--------------|
| <b>(Intercept)</b>                         | 4.318 | 3.254        | 5.730        | < 0.001      |
| <b>publication date</b><br>[<2008 / ≥2008] | 1.109 | 0.975        | 1.261        | 0.115        |
| <b>abstract word count</b>                 | 1.002 | 1.001        | 1.003        | <b>0.001</b> |

24  
25  
26  
27  
28  
29  
30  
31  
32  
33 AIC: 587.27

## 34 35 36 37 DISCUSSION

38  
39 In the present study, 136 RCT abstracts concerning the treatment of AMD were identified  
40 and assessed. The overall quality of reporting based on the CONSORT for abstracts  
41 checklist criteria was with median 7 reported items out of 16 items poor. Only two CONSORT  
42 items ("interventions" and "objectives") were adequately reported in most abstracts (> 90%).  
43 However, no abstract provided complete information on outcomes as required. The main  
44 problem was found in the reporting of effect size and confidence interval (for each trial arm /  
45 group as well as in total). Less than 25% of abstracts included sufficiently reported  
46 "recruitment", "numbers analysed", "conclusions", "trial registration" and "funding".  
47 Information on "randomisation" was available in 29% which also implies that reporting was  
48 not transparent. In the conclusions section most abstracts (96%) reported conclusions  
49 consistent with the results but just a few of them (18%) addressed potential limitations of the  
50 study or noted whether additional studies were required due to different reasons.  
51  
52  
53  
54  
55  
56  
57

1  
2  
3 In particular, none of the 136 abstracts presented sufficient reporting of result outcomes,  
4 which demonstrates the crucial need for improvement in this field by, for example, provision  
5 of explicit instructions for authors in terms of standard reporting formats. The non-reporting of  
6 the effect size and its confidence interval for primary outcome has to be identified as the  
7 main problem.  
8  
9

10  
11 Two further studies of Hua (0% pre- and 2.3% post-CONSORT)[21] and Chen (1%)[10]  
12 presented similar results. Other studies showed better but also improvable reporting of  
13 outcomes (Bigna 25.2% pre and 42.5% post[3]; Can 5.6-18.4% pre and 20.4-38.8% post,  
14 depending on the journal[16]; Berwanger 62.3 % [11]). From our point of view, the abstract is  
15 crucial, and therefore the outcomes are essential in an abstract. Strict fulfilment of all criteria  
16 as indicated by the CONSORT Statement for abstracts was therefore required by the  
17 authors: primary outcome result for each group and for primary outcome as well as effect  
18 size and confidence interval (CI) reported appropriate for trials with binary outcome resp. with  
19 continuous outcome. In this respect, we have not allowed any scope for interpretation and  
20 the parallel reader evaluation followed a strict “no tolerance strategy”, which might explain  
21 the embarrassing result for this item in our investigation. In addition, in a randomised study  
22 with at least two different therapies, it should be possible to present an effect size between  
23 them. Randomised controlled trials are expected to provide a high degree of evidence.  
24 However, 136 RCT abstracts did not contain sufficiently detailed data on the study outcome  
25 (effect size in combination with significance or confidence measure) in such explicit terms as  
26 required by the CONSORT statement. This lack of reporting quality certainly means a more  
27 crucial loss in transparency and reproducibility than, for example, sub-optimal fulfillment of  
28 rather editorial recommendations. In summary, physicians conducting clinical research are  
29 strongly advised to involve a biometrician in the formulation of their results.  
30  
31  
32  
33  
34  
35  
36  
37  
38  
39

40 Age-related macular degeneration is a common eye disease with an increasing need for  
41 research in the last years. However, the reporting quality of RCT abstracts concerning AMD  
42 therapy has not been assessed until we conducted our study. Our findings were disillusioning  
43 but consistent with previous studies assessing the quality of reporting of journal RCT  
44 abstracts concerning different diseases: Bigna[3], for example, found in 2016 in 312  
45 abstracts concerning HIV median 6 reported items pre-CONSORT and median 7 items post-  
46 CONSORT, and stated that this suboptimal improvement was associated with the journal's  
47 high impact factor, large number of authors and non-pharmacological/vaccine intervention in  
48 the trial. Also in 2016, Chhapola found in 891 abstracts in three leading paediatrics  
49 journals[18] median 7 to 8 items (depending on the journal) pre-CONSORT and median 7 to  
50 10 items post-CONSORT. The authors assumed that the reporting quality may be affected  
51 by constraints of space and word limit as well as structured vs. unstructured abstracts.  
52  
53  
54  
55  
56  
57  
58  
59  
60

1  
2  
3 Ghimire[23] investigated 956 phase III oncology trial abstracts published pre- and post-  
4 CONSORT for abstracts and found median 8.2 (95% CI 8.0, 8.3) and 9.9 (95% CI: 9.7, 10.2)  
5 in the pre- and post-CONSORT periods, respectively. A high impact factor and the journal of  
6 publication were independent factors significantly associated with higher reporting quality on  
7 their multivariate analysis. In our study, the multivariate analysis showed that only the  
8 effective number of words had an influence on the quality of abstracts. Hopewell[5] showed  
9 that with a word limit of 250 to 300 words the checklist items could be easily incorporated.  
10 This was also reflected in our investigation: Abstracts with > 250 words showed better  
11 reporting than abstracts with 250 words or less. It is conceivable that with a word limit of  
12 maximum 250 words medical authors focus on medical aspects and less on methodological  
13 aspects such as randomisation, blindness, trial status, or a correct outcome presentation as  
14 recommended by CONSORT. On the other hand, Berwanger 2009[11] impressively  
15 demonstrated the possibility of expressing maximum information about methodological  
16 aspects in just a few words.  
17  
18

19  
20  
21  
22  
23  
24 In this study, the impact factor of journals or structuring of abstracts was not found  
25 associated with the quality of reporting in AMD abstracts as was found in other studies. One  
26 reason for this could be the inclusion of 36 different journals, in which RCTs concerning AMD  
27 were published between 2004 and 2013. We had determined the impact factor (IF) for each  
28 journal depending on the year of publication: Therefore, we had a great variability in the  
29 impact factors ranging from 0 to 52.414 and a median IF of 3.125. Most other studies relate  
30 to abstracts in pre-selected journals[11, 16, 10, 18, 12, 14, 17] specialised in the particular  
31 disease. These studies refer to a handful of pre-selected journals with only a few different  
32 IFs, which possibly explains this influence in contrast to our study. Furthermore, only eight  
33 journals with nine abstracts contained unstructured abstracts in this investigation. This could  
34 be the reason why an influence of abstract structure was not demonstrated here. The  
35 present investigation also failed to demonstrate an improvement of quality after publication of  
36 the CONSORT extension for abstracts in 2008. This result is similar to several previous  
37 surveys[26, 19, 20, 18], whereas some other studies using a simple pre-post comparison  
38 showed a slight improvement[16, 23, 14, 3]. Due to the inclusion of all journals without pre-  
39 selection and over a long period of publication, the authors were not able to identify whether  
40 the respective journal made a reference to the CONSORT Statement at the publication time  
41 of each RCT, and especially whether the journal contained a reference to the CONSORT  
42 extension for abstracts. This is certainly a limitation of this investigation which, however, was  
43 not preventable due to a lack of (online) information.  
44  
45  
46  
47  
48  
49  
50  
51  
52  
53

54  
55 Our investigation shows high process validity from the methodological perspective, as the  
56 identification of RCTs, eligibility decision and data extraction were performed by two  
57  
58

1  
2  
3 independent readers, both having several years of experience in the publication and review  
4 of clinical trials. In addition, all items were clearly parameterised before the investigation by  
5 means of a standard operation procedure on the CONSORT items' evaluation, and then  
6 discussed and mutually validated by means of these procedures. For this purpose, a pilot  
7 study in a different indication (cataract surgery) was carried out[25] in order to identify  
8 possible weaknesses and interferences in advance. Nevertheless, kappa values for some  
9 items only showed moderate inter-observer reliability. This is partly explained by the fact that  
10 it was difficult – based only on the written information – to decide whether abstracts  
11 contained information on “numbers randomised” or “numbers analysed”. Only in a few cases  
12 both information were presented explicitly. Therefore, the “moderate” inter-observer reliability  
13 in these items was not only based on different ratings, but also on non-transparent and  
14 unclear reporting in the respective abstract.  
15  
16  
17  
18  
19  
20

21 We did not take a random sample of RCTs, but rather used systematic review methodology  
22 to identify eligible RCT publication abstracts for our purpose, and then decided to perform a  
23 full cross-sectional census evaluation on these abstracts. The use of a sensitive PubMed  
24 research strategy and the data collection from 2004 to 2013 led to the inclusion of all  
25 published RCTs in AMD with no selection of special journals. This represents the whole body  
26 of scientific evidence in the field of age-related macular degeneration until the end of the  
27 publishing period under consideration – and actually, as we presume – until today. Of course  
28 we are aware that the limitation of publication period (2004 – 2013) must be viewed critically:  
29 We sought to depict a ten-year period in our study, which covered both the period before and  
30 after the publication date of the CONSORT guidelines for abstracts (“CONSORT for  
31 abstracts” was published in January 2008[5]). Since we assumed that these  
32 recommendations did not find immediate uptake in the year of publication, we defined 2004 -  
33 2008 as a 5 years pre-CONSORT and 2009 - 2013 as a sufficiently long-term post-  
34 CONSORT 5 years period. It must be admitted, that even after a sufficient uptake time after  
35 the “CONSORT for abstracts” being published, the publication date is only a proxy for the  
36 actual uptake of the recommendation. For example a publication firstly submitted in 2007 –  
37 thereby not underlying the recommendations' content – might have been published in 2009  
38 after a two years review and editing process. As a consequence, a 2009 “post-CONSORT”  
39 publication would have been miss-classified as actually being written in the pre-CONSORT  
40 period. However, during the literature research on this topic we found that various authors  
41 had already examined the pre-post comparison [3, 18, 21, 14]. For this reason we included  
42 the 2008 cut-point via the binary variable “publication date before / after 2008” in the Poisson  
43 regression model. Consequently, the pre-post comparison was thought to be a possible  
44 factor influencing the quality of the abstracts. This, however, was not confirmed, which could  
45  
46  
47  
48  
49  
50  
51  
52  
53  
54  
55  
56  
57  
58  
59  
60



possibly be due to the selected time periods. A further investigation covering the next five-year period (2014-2018) could possibly show a trend towards CONSORT uptake.

An undeniable limitation is that both readers were not blinded to the journal and publication period so the possibility of assessor bias cannot be ruled out entirely. Furthermore, as in other studies[11, 3, 16, 10, 18, 14, 17], all 16 CONSORT items were equally weighted and only the presence of an item was rated as “yes / no”. However, it can be noted that certainly not all items have the same impact on the transparency of the reporting process, and some items, e.g. on explicit result presentation, are certainly be more important than others such as details on funding. Nevertheless, all items of the CONSORT checklist should be reported in an abstract and a median number of reported items of 7 (95% CI 7; 8) must be considered as poor reporting quality.

A further limitation is that this study was carried out without preparing a study protocol in advance, as its evaluation was based on the previously tried and tested procedure of the pilot study.[25] Nevertheless, there remains a risk of selective reporting.

In summary, the reporting quality of RCT abstracts on AMD health care showed a considerable potential for improvement to meet the CONSORT abstract reporting recommendations. The reporting of the outcomes in particular was disillusioning, even though CONSORT provides detailed information in its checklist explanations on how these results should be presented. Since these further explanations are very detailed, it seems as if these notes are hardly being read, and therefore lack the degree of awareness they deserve. One way to remedy this would be to provide elaborate examples / templates by means of commented "best-practice abstracts" a supplementary material to a journal's "instructions for authors". These abstracts would be held in the authors' terminology and clinical context, and thereby would become much more accessible than easier to imitate for the clinical author than the transfer of recommendation explanations.

Furthermore, word count limits for abstracts of 250 were identified as a significant determinant of the overall abstract reporting quality. These word count limits could possibly be neglected if annotated best-practice abstracts were made available, or else they could be modified according to the requirements of the respective journals in order to improve quality. To reduce the amount of Research-waste[27] improvements in abstract quality are urgently needed. In particular, the correct statement of the exact effect size is of utmost importance in an abstract, in order to be able to transfer a statement into everyday clinical practice.

## REFERENCES

- 1 Concato J, Shah N, Horwitz RI. Randomized, controlled trials, observational studies, and the hierarchy of research designs. *N Engl J Med* 2000;342:1887-92.doi:10.1056/NEJM200006223422507.
- 2 Stolberg HO, Norman G, Trop I. Randomized controlled trials. *AJR Am J Roentgenol* 2004;183:1539-44.doi:10.2214/ajr.183.6.01831539.
- 3 Bigna JJ, Noubiap JJ, Asangbeh SL, et al. Abstracts reporting of HIV/AIDS randomized controlled trials in general medicine and infectious diseases journals: completeness to date and improvement in the quality since CONSORT extension for abstracts. *BMC Med Res Methodol* 2016;16:138.doi:10.1186/s12874-016-0243-y.
- 4 The impact of open access upon public health. *PLoS Med* 2006;3:e252.doi:10.1371/journal.pmed.0030252.
- 5 Hopewell S, Clarke M, Moher D, et al. CONSORT for reporting randomized controlled trials in journal and conference abstracts: explanation and elaboration. *PLoS Med* 2008;5:e20.doi:10.1371/journal.pmed.0050020.
- 6 Begg C, Cho M, Eastwood S, et al. Improving the quality of reporting of randomized controlled trials. The CONSORT statement. *JAMA* 1996;276:637-9
- 7 Moher D, Schulz KF, Altman DG, et al. The CONSORT statement: revised recommendations for improving the quality of reports of parallel group randomized trials. *BMC Med Res Methodol* 2001;1:2
- 8 Moher D, Hopewell S, Schulz KF, et al. CONSORT 2010 explanation and elaboration: updated guidelines for reporting parallel group randomised trials. *BMJ* 2010;340:c869.doi:10.1136/bmj.c869.
- 9 Schulz KF, Altman DG, Moher D, et al. CONSORT 2010 Statement: updated guidelines for reporting parallel group randomised trials. *Trials* 2010;11:32.doi:10.1186/1745-6215-11-32.
- 10 Chen Y, Li J, Ai C, et al. Assessment of the quality of reporting in abstracts of randomized controlled trials published in five leading Chinese medical journals. *PLoS One* 2010;5:e11926.doi:10.1371/journal.pone.0011926.
- 11 Berwanger O, Ribeiro RA, Finkelsztejn A, et al. The quality of reporting of trial abstracts is suboptimal: survey of major general medical journals. *J Clin Epidemiol* 2009;62:387-92.doi:10.1016/j.jclinepi.2008.05.013.
- 12 Ghimire S, Kyung E, Kang W, et al. Assessment of adherence to the CONSORT statement for quality of reports on randomized controlled trial abstracts from four high-impact general medical journals. *Trials* 2012;13:77.doi:10.1186/1745-6215-13-77.
- 13 Knobloch K, Vogt PM. Adherence to CONSORT abstract reporting suggestions in surgical randomized-controlled trials published in *Annals of Surgery*. *Ann Surg* 2011;254:546; author reply -7.doi:10.1097/SLA.0b013e31822ad829.
- 14 Mbuagbaw L, Thabane M, Vanniyasingam T, et al. Improvement in the quality of abstracts in major clinical journals since CONSORT extension for abstracts: a systematic review. *Contemp Clin Trials* 2014;38:245-50.doi:10.1016/j.cct.2014.05.012.
- 15 Samaan Z, Mbuagbaw L, Kosa D, et al. A systematic scoping review of adherence to reporting guidelines in health care literature. *J Multidiscip Healthc* 2013;6:169-88.doi:10.2147/JMDH.S43952.
- 16 Can OS, Yilmaz AA, Hasdogan M, et al. Has the quality of abstracts for randomised controlled trials improved since the release of Consolidated Standards of Reporting Trial guideline for abstract reporting? A survey of four high-profile anaesthesia journals. *Eur J Anaesthesiol* 2011;28:485-92.doi:10.1097/EJA.0b013e32833fb96f.
- 17 Wang L, Li Y, Li J, et al. Quality of reporting of trial abstracts needs to be improved: using the CONSORT for abstracts to assess the four leading Chinese medical journals of traditional Chinese medicine. *Trials* 2010;11:75.doi:10.1186/1745-6215-11-75.
- 18 Chhapola V, Tiwari S, Brar R, et al. An interrupted time series analysis showed suboptimal improvement in reporting quality of trial abstract. *J Clin Epidemiol* 2016;71:11-7.doi:10.1016/j.jclinepi.2015.10.013.
- 19 Kiriakou J, Pandis N, Madianos P, et al. Assessing the reporting quality in abstracts of randomized controlled trials in leading journals of oral implantology. *J Evid Based Dent Pract* 2014;14:9-15.doi:10.1016/j.jebdp.2013.10.018.

- 1  
2  
3 20 Seehra J, Wright NS, Polychronopoulou A, et al. Reporting quality of abstracts of  
4 randomized controlled trials published in dental specialty journals. *J Evid Based Dent Pract*  
5 2013;13:1-8.doi:10.1016/j.jebdp.2012.11.001.  
6 21 Hua F, Walsh T, Glenny AM, et al. Reporting quality of randomized controlled trial  
7 abstracts presented at European Orthodontic Society congresses. *Eur J Orthod*  
8 2016;38:584-92.doi:10.1093/ejo/cjv094.  
9 22 Faggion CM, Jr., Giannakopoulos NN. Quality of reporting in abstracts of randomized  
10 controlled trials published in leading journals of periodontology and implant dentistry: a  
11 survey. *J Periodontol* 2012;83:1251-6.doi:10.1902/jop.2012.110609.  
12 23 Ghimire S, Kyung E, Lee H, et al. Oncology trial abstracts showed suboptimal  
13 improvement in reporting: a comparative before-and-after evaluation using CONSORT for  
14 Abstract guidelines. *J Clin Epidemiol* 2014;67:658-66.doi:10.1016/j.jclinepi.2013.10.012.  
15 24 Bressler NM, Bressler SB, Childs AL, et al. Surgery for hemorrhagic choroidal  
16 neovascular lesions of age-related macular degeneration: ophthalmic findings: SST report  
17 no. 13. *Ophthalmology* 2004;111:1993-2006.doi:10.1016/j.ophtha.2004.07.023.  
18 25 Baulig C, Krummenauer F, Knippschild S. [Evaluation of methodological quality in  
19 published RCTs on cataract surgery : Pilot study on the degree of adherence to CONSORT  
20 statement requirements and their qualitative validity]. *Ophthalmologe* 2018;115:40-  
21 6.doi:10.1007/s00347-017-0446-6.  
22 26 Blair DA, Hughes PJ, Woolley TW, Jr. Pharmacy journal abstracts published in PubMed  
23 that abide by the CONSolidated Standards Of Reporting Trials (CONSORT) guidelines. *J*  
24 *Med Libr Assoc* 2014;102:110-4.doi:10.3163/1536-5050.102.2.010.  
25 27 Glasziuo P, Altman DG, Bossouyt P, et al. Reducing waste from incomplete or unusable  
26 reports of biomedical research. *Lancet* 2014;383:257-66  
27  
28  
29  
30

### 31 **Acknowledgment**

32  
33 The authors would like to thank Mrs Manuela Munk and Mrs Tara Rödter for linguistic  
34 support in preparing this manuscript.  
35  
36  
37  
38  
39

### 40 **Funding**

41  
42 The authors are grateful to the Internal Research Foundation Initiative of the Witten /  
43 Herdecke University's Faculty of Health, which enabled this investigation by means of a  
44 supportive research grant comprising a one-year research position for Dr. Stephanie  
45 Knippschild.  
46  
47  
48  
49  
50

### 51 **Authors' Contributions**

52  
53 Grant application: CB, SK, FK. Study conception and design: CB, SK, FK. Data collection:  
54 CB, SK. Abstract selection: CB, SK. Data extraction: CB; SK. Statistical analysis: FK, BG,  
55  
56  
57  
58  
59

1  
2  
3 ST. Data interpretation: CB, SK, FK, BG, ST. Drafting: CB. Critical discussion and  
4 manuscript revision: FK, SK. Approval of final version: All authors.  
5  
6  
7

### 8 **Data sharing statement** 9

10 The data may be obtained from the authors for academic purposes.  
11  
12  
13  
14

### 15 **Figure 1:**

16  
17 Flowchart of the literature search and identification of randomized controlled clinical trial  
18 abstracts, the exclusion of studies took place sequentially in the following order: no abstracts  
19 available, not affiliated to AMD, inappropriate study design, no indication for randomisation.  
20  
21  
22  
23  
24  
25  
26  
27  
28  
29  
30  
31  
32  
33  
34  
35  
36  
37  
38  
39  
40  
41  
42  
43  
44  
45  
46  
47  
48  
49  
50  
51  
52  
53  
54  
55  
56  
57  
58  
59  
60

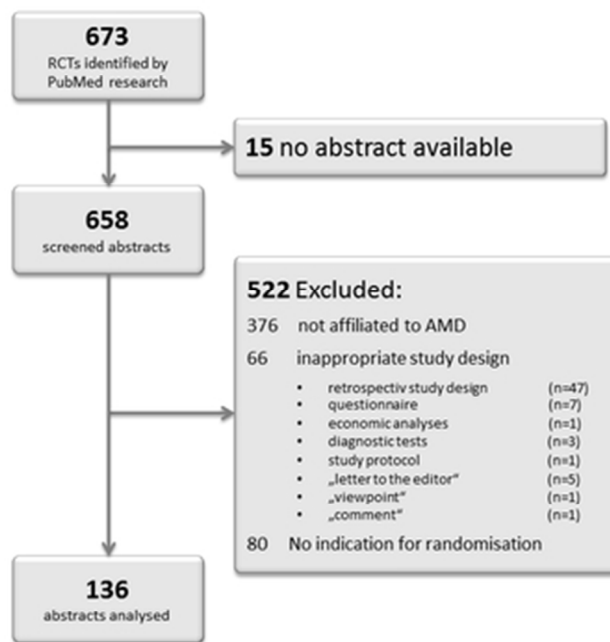

31  
32  
33  
34  
35  
36  
37  
38  
39  
40  
41  
42  
43  
44  
45  
46  
47  
48  
49  
50  
51  
52  
53  
54  
55  
56  
57  
58  
59  
60

Flowchart of the literature search and identification of randomized controlled clinical trial abstracts. The exclusion of studies took place sequentially in the following order: no abstracts available, not affiliated to AMD, inappropriate study design, no indication for randomisation.

45x34mm (300 x 300 DPI)

**Supplement: Table S**

Adherence of RCTs (N=136) to individual items of the CONSORT checklist for abstracts: declaration of items to be considered in the abstract according to the CONSORT recommendations, evaluation criteria for the respective abstracts, total and relative frequency [%] of abstracts providing information on the respective items according to the evaluation criteria; sub-items (\* marked) are taken from Explanations and Elaborations of CONSORT for Abstracts checklist[5].

For peer review only

| Item                              | assessment criteria                                                                                       | absolute and relative frequency of abstracts reporting the item (N = 136) (%) |
|-----------------------------------|-----------------------------------------------------------------------------------------------------------|-------------------------------------------------------------------------------|
| <b>Title</b>                      | identification of the study as randomised                                                                 | 57 (42%)                                                                      |
| <b>Trial design</b>               | description of the trial design                                                                           | 97 (71%)                                                                      |
| <b>Participants</b>               | eligibility criteria for participants and setting where data was collected                                | 123 (90%)                                                                     |
| <b>Interventions</b>              | were interventions intended for each group                                                                | 129 (95%)                                                                     |
| <b>Objectives</b>                 | specific objectives or hypotheses                                                                         | 133 (98%)                                                                     |
| <b>Definition primary outcome</b> | clearly defined primary outcome                                                                           | 95 (70%)                                                                      |
| <b>Randomisation</b>              | How for this report participants were allocated to interventions                                          | 39 (29%)                                                                      |
| <b>Blinding (masking)</b>         | whether or not participants, caregivers and those assessing the outcomes were blinded to group assignment | 59 (43%)                                                                      |
| <b>Numbers randomised</b>         | number of participants randomised to each group                                                           | 75 (55%)                                                                      |
| <b>Recruitment</b>                | trial status                                                                                              | 12 (9%)                                                                       |
| <b>Numbers analysed</b>           | number of participants analysed in each group                                                             | 30 (22%)                                                                      |
| <b>Outcomes</b>                   | fulfilling both criteria as:                                                                              | 0 (0%)                                                                        |
|                                   | – primary outcome for each trial group / trial arm*                                                       | 87 (64%)                                                                      |
|                                   | – for primary outcome, effect size and precision (confidence interval) reported (in total)*               | 9 (7%)                                                                        |
| <b>Harms</b>                      | important adverse events or side effects                                                                  | 65 (48%)                                                                      |
| <b>Conclusions</b>                | general interpretation of the results fulfilling both criteria:                                           | 23 (17%)                                                                      |
|                                   | – consistency with the results reported in the abstract*                                                  | 130 (96%)                                                                     |
|                                   | – benefits and harms reported*                                                                            | 24 (18%)                                                                      |
| <b>Trial registration</b>         | registration number and name of trial register                                                            | 26 (19%)                                                                      |
| <b>Funding</b>                    | source of funding                                                                                         | 33 (24%)                                                                      |

1  
2  
3 Recent queries in pubmed

4 Search,Query,Items found,Time

5 #12,"Search (((((macular degeneration) AND ("2004/01/01"[Date - Publication] : "2013/12/31"  
6 [Date - Publication]))) AND english[Language])) AND "randomized controlled trial"[Publication Type]",673,  
7 07:44:11

8  
9 #11,"Search (((macular degeneration) AND ("2004/01/01"[Date - Publication] : "2013/12/31"  
10 [Date - Publication]))) AND english[Language]",11737,07:44:00

11 #10,"Search (macular degeneration) AND ("2004/01/01"[Date - Publication] : "2013/12/31"  
12 [Date - Publication])",13068,07:43:41

13 #1,"Search macular degeneration",22957,07:00:29  
14  
15  
16  
17  
18  
19  
20  
21  
22  
23  
24  
25  
26  
27  
28  
29  
30  
31  
32  
33  
34  
35  
36  
37  
38  
39  
40  
41  
42  
43  
44  
45  
46  
47  
48  
49  
50  
51  
52  
53  
54  
55  
56  
57  
58  
59  
60

For peer review only



## Evaluated study abstracts [1-136]

- 1 Abraham P, Yue H, Wilson L. Randomized, double-masked, sham-controlled trial of ranibizumab for neovascular age-related macular degeneration: PIER study year 2. *Am J Ophthalmol* 2010;150:315-24 e1.doi:10.1016/j.ajo.2010.04.011.
- 2 Adjunctive Diclofenac with Verteporfin Study G, Boyer DS, Beer PM, et al. Effect of adjunctive diclofenac with verteporfin therapy to treat choroidal neovascularization due to age-related macular degeneration: phase II study. *Retina* 2007;27:693-700.doi:10.1097/IAE.0b013e318030e519.
- 3 Agurto-Rivera R, Diaz-Rubio J, Torres-Bernal L, et al. Intravitreal triamcinolone with transpupillary therapy for subfoveal choroidal neovascularization in age related macular degeneration. A randomized controlled pilot study [ISRCTN74123635]. *BMC Ophthalmol* 2005;5:27.doi:10.1186/1471-2415-5-27.
- 4 Ahmadi A, Ghanbari H, Soheilian M, et al. The EFFect of HESA-A (natural drug) on visual acuity in age related macular degeneration: a randomized double blind controlled clinical trial. *Afr J Tradit Complement Altern Med* 2009;6:549-53
- 5 Ahmadi H, Taei R, Riaz-Esfahani M, et al. Intravitreal bevacizumab versus combined intravitreal bevacizumab and triamcinolone for neovascular age-related macular degeneration: six-month results of a randomized clinical trial. *Retina* 2011;31:1819-26.doi:10.1097/IAE.0b013e31820d58f2.
- 6 Antoszyk AN, Tuomi L, Chung CY, et al. Ranibizumab combined with verteporfin photodynamic therapy in neovascular age-related macular degeneration (FOCUS): year 2 results. *Am J Ophthalmol* 2008;145:862-74.doi:10.1016/j.ajo.2007.12.029.
- 7 Arias L, Garcia-Arumi J, Ramon JM, et al. Photodynamic therapy with intravitreal triamcinolone in predominantly classic choroidal neovascularization: one-year results of a randomized study. *Ophthalmology* 2006;113:2243-50.doi:10.1016/j.ophtha.2006.04.039.
- 8 Arnold C, Jentsch S, Dawczynski J, et al. Age-related macular degeneration: Effects of a short-term intervention with an oleaginous kale extract--a pilot study. *Nutrition* 2013;29:1412-7.doi:10.1016/j.nut.2013.05.012.
- 9 Arnold C, Winter L, Frohlich K, et al. Macular xanthophylls and omega-3 long-chain polyunsaturated fatty acids in age-related macular degeneration: a randomized trial. *JAMA Ophthalmol* 2013;131:564-72.doi:10.1001/jamaophthalmol.2013.2851.
- 10 Augustin AJ, D'Amico DJ, Mieler WF, et al. Safety of posterior juxtasclear depot administration of the angiostatic cortisone anecortave acetate for treatment of subfoveal choroidal neovascularization in patients with age-related macular degeneration. *Graefes Arch Clin Exp Ophthalmol* 2005;243:9-12.doi:10.1007/s00417-004-0961-4.
- 11 Azab M, Boyer DS, Bressler NM, et al. Verteporfin therapy of subfoveal minimally classic choroidal neovascularization in age-related macular degeneration: 2-year results of a randomized clinical trial. *Arch Ophthalmol* 2005;123:448-57.doi:10.1001/archophth.123.4.448.
- 12 Barakat MR, Metelitsina TI, DuPont JC, et al. Effect of niacin on retinal vascular diameter in patients with age-related macular degeneration. *Curr Eye Res* 2006;31:629-34.doi:10.1080/02713680600760501.
- 13 Bashshur ZF, Schakal A, Hamam RN, et al. Intravitreal bevacizumab vs verteporfin photodynamic therapy for neovascular age-related macular degeneration. *Arch Ophthalmol* 2007;125:1357-61.doi:10.1001/archophth.125.10.1357.
- 14 Beatty S, Chakravarthy U, Nolan JM, et al. Secondary outcomes in a clinical trial of carotenoids with coantioxidants versus placebo in early age-related macular degeneration. *Ophthalmology* 2013;120:600-6.doi:10.1016/j.ophtha.2012.08.040.
- 15 Berrow EJ, Bartlett HE, Eperjesi F, et al. The effects of a lutein-based supplement on objective and subjective measures of retinal and visual function in eyes with age-related maculopathy -- a randomised controlled trial. *Br J Nutr* 2013;109:2008-14.doi:10.1017/S0007114512004187.
- 16 Blaha M, Rencova E, Blaha V, et al. The importance of rheological parameters in the therapy of microcirculatory disorders. *Clin Hemorheol Microcirc* 2009;42:37-46.doi:10.3233/CH-2009-1184.

- 1  
2  
3 17 Blaha M, Rencova E, Langrova H, et al. Rheohaemapheresis in the treatment of nonvascular age-  
4 related macular degeneration. *Atheroscler Suppl* 2013;14:179-  
5 84.doi:10.1016/j.atherosclerosissup.2012.10.023.  
6  
7 18 Boyer DS, Heier JS, Brown DM, et al. A Phase IIIb study to evaluate the safety of ranibizumab in  
8 subjects with neovascular age-related macular degeneration. *Ophthalmology* 2009;116:1731-  
9 9.doi:10.1016/j.ophtha.2009.05.024.  
10  
11 19 Bressler NM, Bressler SB, Childs AL, et al. Surgery for hemorrhagic choroidal neovascular lesions of  
12 age-related macular degeneration: ophthalmic findings: SST report no. 13. *Ophthalmology*  
13 2004;111:1993-2006.doi:10.1016/j.ophtha.2004.07.023.  
14  
15 20 Brown DM, Chen E, Mariani A, et al. Super-dose anti-VEGF (SAVE) trial: 2.0 mg intravitreal  
16 ranibizumab for recalcitrant neovascular macular degeneration-primary end point. *Ophthalmology*  
17 2013;120:349-54.doi:10.1016/j.ophtha.2012.08.008.  
18  
19 21 Brown DM, Heier JS, Ciulla T, et al. Primary endpoint results of a phase II study of vascular  
20 endothelial growth factor trap-eye in wet age-related macular degeneration. *Ophthalmology*  
21 2011;118:1089-97.doi:10.1016/j.ophtha.2011.02.039.  
22  
23 22 Brown DM, Kaiser PK, Michels M, et al. Ranibizumab versus verteporfin for neovascular age-  
24 related macular degeneration. *N Engl J Med* 2006;355:1432-44.doi:10.1056/NEJMoa062655.  
25  
26 23 Brown DM, Michels M, Kaiser PK, et al. Ranibizumab versus verteporfin photodynamic therapy for  
27 neovascular age-related macular degeneration: Two-year results of the ANCHOR study.  
28 *Ophthalmology* 2009;116:57-65 e5.doi:10.1016/j.ophtha.2008.10.018.  
29  
30 24 Busbee BG, Ho AC, Brown DM, et al. Twelve-month efficacy and safety of 0.5 mg or 2.0 mg  
31 ranibizumab in patients with subfoveal neovascular age-related macular degeneration.  
32 *Ophthalmology* 2013;120:1046-56.doi:10.1016/j.ophtha.2012.10.014.  
33  
34 25 Chakravarthy U, Harding SP, Rogers CA, et al. Alternative treatments to inhibit VEGF in age-related  
35 choroidal neovascularisation: 2-year findings of the IVAN randomised controlled trial. *Lancet*  
36 2013;382:1258-67.doi:10.1016/S0140-6736(13)61501-9.  
37  
38 26 Chang MA, Do DV, Bressler SB, et al. Prospective one-year study of ranibizumab for predominantly  
39 hemorrhagic choroidal neovascular lesions in age-related macular degeneration. *Retina*  
40 2010;30:1171-6.doi:10.1097/IAE.0b013e3181dd6d8a.  
41  
42 27 Chaudhary V, Mao A, Hooper PL, et al. Triamcinolone acetonide as adjunctive treatment to  
43 verteporfin in neovascular age-related macular degeneration: a prospective randomized trial.  
44 *Ophthalmology* 2007;114:2183-9.doi:10.1016/j.ophtha.2007.02.013.  
45  
46 28 Cohen SY, Bourgeois H, Corbe C, et al. Randomized clinical trial France DMLA2: effect of  
47 trimetazidine on exudative and nonexudative age-related macular degeneration. *Retina* 2012;32:834-  
48 43.doi:10.1097/IAE.0b013e31822058a3.  
49  
50 29 Comparison of Age-related Macular Degeneration Treatments Trials Research G, Martin DF,  
51 Maguire MG, et al. Ranibizumab and bevacizumab for treatment of neovascular age-related macular  
52 degeneration: two-year results. *Ophthalmology* 2012;119:1388-  
53 98.doi:10.1016/j.ophtha.2012.03.053.  
54  
55 30 Costagliola C, Romano MR, Rinaldi M, et al. Low fluence rate photodynamic therapy combined  
56 with intravitreal bevacizumab for neovascular age-related macular degeneration. *Br J Ophthalmol*  
57 2010;94:180-4.doi:10.1136/bjo.2009.159343.  
58  
59 31 Danis R, McLaughlin MM, Tolentino M, et al. Pazopanib eye drops: a randomised trial in  
60 neovascular age-related macular degeneration. *Br J Ophthalmol* 2014;98:172-  
8.doi:10.1136/bjophthalmol-2013-303117.  
32 Dawczynski J, Jentsch S, Schweitzer D, et al. Long term effects of lutein, zeaxanthin and omega-3-  
LCPUFAs supplementation on optical density of macular pigment in AMD patients: the LUTEGA study.  
*Graefes Arch Clin Exp Ophthalmol* 2013;251:2711-23.doi:10.1007/s00417-013-2376-6.  
33 Dugel PU, Bebbchuk JD, Nau J, et al. Epimacular brachytherapy for neovascular age-related macular  
degeneration: a randomized, controlled trial (CABERNET). *Ophthalmology* 2013;120:317-  
27.doi:10.1016/j.ophtha.2012.07.068.

- 1  
2  
3 34 Dunavoelgyi R, Sacu S, Simader C, et al. Changes in macular sensitivity after reduced fluence  
4 photodynamic therapy combined with intravitreal triamcinolone. *Acta Ophthalmol* 2011;89:166-  
5 71.doi:10.1111/j.1755-3768.2009.01646.x.  
6  
7 35 Eklund K, Sjostrand J, Dahlin-Ivanoff S. A randomized controlled trial of a health-promotion  
8 programme and its effect on ADL dependence and self-reported health problems for the elderly  
9 visually impaired. *Scand J Occup Ther* 2008;15:68-74.doi:10.1080/11038120701442963.  
10  
11 36 El-Mollayess GM, Mahfoud Z, Schakal AR, et al. Fixed-interval versus OCT-guided variable dosing  
12 of intravitreal bevacizumab in the management of neovascular age-related macular degeneration: a  
13 12-month randomized prospective study. *Am J Ophthalmol* 2012;153:481-9  
14 e1.doi:10.1016/j.ajo.2011.08.018.  
15  
16 37 Falkner-Radler CI, Krebs I, Glittenberg C, et al. Human retinal pigment epithelium (RPE)  
17 transplantation: outcome after autologous RPE-choroid sheet and RPE cell-suspension in a  
18 randomised clinical study. *Br J Ophthalmol* 2011;95:370-5.doi:10.1136/bjo.2009.176305.  
19  
20 38 Falsini B, Piccardi M, Minnella A, et al. Influence of saffron supplementation on retinal flicker  
21 sensitivity in early age-related macular degeneration. *Invest Ophthalmol Vis Sci* 2010;51:6118-  
22 24.doi:10.1167/iovs.09-4995.  
23  
24 39 Feher J, Kovacs B, Kovacs I, et al. Improvement of visual functions and fundus alterations in early  
25 age-related macular degeneration treated with a combination of acetyl-L-carnitine, n-3 fatty acids,  
26 and coenzyme Q10. *Ophthalmologica* 2005;219:154-66.doi:10.1159/000085248.  
27  
28 40 Figueroa M, Schocket LS, DuPont J, et al. Long-term effect of laser treatment for dry age-related  
29 macular degeneration on choroidal hemodynamics. *Am J Ophthalmol* 2006;141:863-  
30 7.doi:10.1016/j.ajo.2005.11.049.  
31  
32 41 Flaxel C, Schain MB, Hamon SC, et al. Prospective randomized controlled trial of combination  
33 ranibizumab (Lucentis) and bromfenac (Xibrom) for neovascular age-related macular degeneration: a  
34 pilot study. *Retina* 2012;32:417-23.doi:10.1097/IAE.0b013e318229b0af.  
35  
36 42 Frennesson CI, Bek T, Jaakkola A, et al. Prophylactic laser treatment of soft drusen maculopathy: a  
37 prospective, randomized Nordic study. *Acta Ophthalmol* 2009;87:720-4.doi:10.1111/j.1755-  
38 3768.2008.01396.x.  
39  
40 43 Friberg TR, Musch DC, Lim JI, et al. Prophylactic treatment of age-related macular degeneration  
41 report number 1: 810-nanometer laser to eyes with drusen. Unilaterally eligible patients.  
42 *Ophthalmology* 2006;113:622 e1.doi:10.1016/j.ophtha.2005.10.066.  
43  
44 44 Fung AT, Kumar N, Vance SK, et al. Pilot study to evaluate the role of high-dose ranibizumab 2.0  
45 mg in the management of neovascular age-related macular degeneration in patients with  
46 persistent/recurrent macular fluid <30 days following treatment with intravitreal anti-VEGF therapy  
47 (the LAST Study). *Eye (Lond)* 2012;26:1181-7.doi:10.1038/eye.2012.174.  
48  
49 45 Garcia-Layana A, Recalde S, Alaman AS, et al. Effects of lutein and docosahexaenoic Acid  
50 supplementation on macular pigment optical density in a randomized controlled trial. *Nutrients*  
51 2013;5:543-51.doi:10.3390/nu5020543.  
52  
53 46 Gelisken F, Voelker M, Schwabe R, et al. Full macular translocation versus photodynamic therapy  
54 with verteporfin in the treatment of neovascular age-related macular degeneration: 1-year results of  
55 a prospective, controlled, randomised pilot trial (FMT-PDT). *Graefes Arch Clin Exp Ophthalmol*  
56 2007;245:1085-95.doi:10.1007/s00417-006-0524-y.  
57  
58 47 Gillies MC, Simpson JM, Billson FA, et al. Safety of an intravitreal injection of triamcinolone: results  
59 from a randomized clinical trial. *Arch Ophthalmol* 2004;122:336-40.doi:10.1001/archophth.122.3.336.  
60  
61 48 Gragoudas ES, Adamis AP, Cunningham ET, Jr., et al. Pegaptanib for neovascular age-related  
62 macular degeneration. *N Engl J Med* 2004;351:2805-16.doi:10.1056/NEJMoa042760.  
63  
64 49 Group AHSR, Chew EY, Clemons TE, et al. Randomized trial of a home monitoring system for early  
65 detection of choroidal neovascularization home monitoring of the Eye (HOME) study. *Ophthalmology*  
66 2014;121:535-44.doi:10.1016/j.ophtha.2013.10.027.  
67  
68 50 Group CR, Martin DF, Maguire MG, et al. Ranibizumab and bevacizumab for neovascular age-  
69 related macular degeneration. *N Engl J Med* 2011;364:1897-908.doi:10.1056/NEJMoa1102673.  
70

- 1  
2  
3 51 Group VISIONCT, Chakravarthy U, Adamis AP, et al. Year 2 efficacy results of 2 randomized  
4 controlled clinical trials of pegaptanib for neovascular age-related macular degeneration.  
5 *Ophthalmology* 2006;113:1508 e1-25.doi:10.1016/j.ophtha.2006.02.064.  
6  
7 52 Group VISIONCT, D'Amico DJ, Masonson HN, et al. Pegaptanib sodium for neovascular age-related  
8 macular degeneration: two-year safety results of the two prospective, multicenter, controlled clinical  
9 trials. *Ophthalmology* 2006;113:992-1001 e6.doi:10.1016/j.ophtha.2006.02.027.  
10  
11 53 Gustavsson C, Agardh E. Transpupillary thermotherapy for occult subfoveal choroidal  
12 neovascularization: a 1-year, prospective randomized pilot study. *Acta Ophthalmol Scand*  
13 2005;83:148-53.doi:10.1111/j.1600-0420.2005.00427.x.  
14  
15 54 Guymer RH, Baird PN, Varsamidis M, et al. Proof of concept, randomized, placebo-controlled  
16 study of the effect of simvastatin on the course of age-related macular degeneration. *PLoS One*  
17 2013;8:e83759.doi:10.1371/journal.pone.0083759.  
18  
19 55 Hawkins BS, Bressler NM, Miskala PH, et al. Surgery for subfoveal choroidal neovascularization in  
20 age-related macular degeneration: ophthalmic findings: SST report no. 11. *Ophthalmology*  
21 2004;111:1967-80.doi:10.1016/j.ophtha.2004.07.021.  
22  
23 56 Heier JS, Antoszyk AN, Pavan PR, et al. Ranibizumab for treatment of neovascular age-related  
24 macular degeneration: a phase I/II multicenter, controlled, multidose study. *Ophthalmology*  
25 2006;113:633 e1-4.doi:10.1016/j.ophtha.2005.10.052.  
26  
27 57 Heier JS, Boyer D, Nguyen QD, et al. The 1-year results of CLEAR-IT 2, a phase 2 study of vascular  
28 endothelial growth factor trap-eye dosed as-needed after 12-week fixed dosing. *Ophthalmology*  
29 2011;118:1098-106.doi:10.1016/j.ophtha.2011.03.020.  
30  
31 58 Heier JS, Boyer DS, Ciulla TA, et al. Ranibizumab combined with verteporfin photodynamic therapy  
32 in neovascular age-related macular degeneration: year 1 results of the FOCUS Study. *Arch*  
33 *Ophthalmol* 2006;124:1532-42.doi:10.1001/archophth.124.11.1532.  
34  
35 59 Heier JS, Brown DM, Chong V, et al. Intravitreal aflibercept (VEGF trap-eye) in wet age-related  
36 macular degeneration. *Ophthalmology* 2012;119:2537-48.doi:10.1016/j.ophtha.2012.09.006.  
37  
38 60 Huang YM, Yan SF, Ma L, et al. Serum and macular responses to multiple xanthophyll supplements  
39 in patients with early age-related macular degeneration. *Nutrition* 2013;29:387-  
40 92.doi:10.1016/j.nut.2012.06.009.  
41  
42 61 Investigators IS, Chakravarthy U, Harding SP, et al. Ranibizumab versus bevacizumab to treat  
43 neovascular age-related macular degeneration: one-year findings from the IVAN randomized trial.  
44 *Ophthalmology* 2012;119:1399-411.doi:10.1016/j.ophtha.2012.04.015.  
45  
46 62 Jaakkola A, Heikkinen J, Tommila P, et al. Strontium plaque brachytherapy for exudative age-  
47 related macular degeneration: three-year results of a randomized study. *Ophthalmology*  
48 2005;112:567-73.doi:10.1016/j.ophtha.2004.11.029.  
49  
50 63 Jackson TL, Chakravarthy U, Kaiser PK, et al. Stereotactic radiotherapy for neovascular age-related  
51 macular degeneration: 52-week safety and efficacy results of the INTREPID study. *Ophthalmology*  
52 2013;120:1893-900.doi:10.1016/j.ophtha.2013.02.016.  
53  
54 64 Jackson TL, Dugel PU, Bechuk JD, et al. Epimacular brachytherapy for neovascular age-related  
55 macular degeneration (CABERNET): fluorescein angiography and optical coherence tomography.  
56 *Ophthalmology* 2013;120:1597-603.doi:10.1016/j.ophtha.2013.01.074.  
57  
58 65 Kaiser PK, Boyer DS, Cruess AF, et al. Verteporfin plus ranibizumab for choroidal  
59 neovascularization in age-related macular degeneration: twelve-month results of the DENALI study.  
60 *Ophthalmology* 2012;119:1001-10.doi:10.1016/j.ophtha.2012.02.003.  
61  
62 66 Kaiser PK, Visudyne In Occult CNVsg. Verteporfin PDT for subfoveal occult CNV in AMD: two-year  
63 results of a randomized trial. *Curr Med Res Opin* 2009;25:1853-60.doi:10.1185/03007990903038616.  
64  
65 67 Kodjikian L, Souied EH, Mimoun G, et al. Ranibizumab versus Bevacizumab for Neovascular Age-  
66 related Macular Degeneration: Results from the GEFAL Noninferiority Randomized Trial.  
67 *Ophthalmology* 2013;120:2300-9.doi:10.1016/j.ophtha.2013.06.020.  
68  
69 68 Krebs I, Schmetterer L, Boltz A, et al. A randomised double-masked trial comparing the visual  
70 outcome after treatment with ranibizumab or bevacizumab in patients with neovascular age-related  
71 macular degeneration. *Br J Ophthalmol* 2013;97:266-71.doi:10.1136/bjophthalmol-2012-302391.

- 1  
2  
3 69 Krebs I, Vecsei Marlovits V, Bodenstorfer J, et al. Comparison of Ranibizumab monotherapy versus  
4 combination of Ranibizumab with photodynamic therapy with neovascular age-related macular  
5 degeneration. *Acta Ophthalmol* 2013;91:e178-83.doi:10.1111/aos.12018.
- 6 70 Larsen M, Schmidt-Erfurth U, Lanzetta P, et al. Verteporfin plus ranibizumab for choroidal  
7 neovascularization in age-related macular degeneration: twelve-month MONT BLANC study results.  
8 *Ophthalmology* 2012;119:992-1000.doi:10.1016/j.ophtha.2012.02.002.
- 9 71 Lazic R, Gabric N. Verteporfin therapy and intravitreal bevacizumab combined and alone in  
10 choroidal neovascularization due to age-related macular degeneration. *Ophthalmology*  
11 2007;114:1179-85.doi:10.1016/j.ophtha.2007.03.006.
- 12 72 Lee J, Freeman WR, Azen SP, et al. Prospective, randomized clinical trial of intravitreal  
13 triamcinolone treatment of neovascular age-related macular degeneration: one-year results. *Retina*  
14 2007;27:1205-13.doi:10.1097/IAE.0b013e31815ec367.
- 15 73 Li X, Hu Y, Sun X, et al. Bevacizumab for neovascular age-related macular degeneration in China.  
16 *Ophthalmology* 2012;119:2087-93.doi:10.1016/j.ophtha.2012.05.016.
- 17 74 Lushchik T, Amarakoon S, Martinez-Ciriano JP, et al. Bevacizumab in age-related macular  
18 degeneration: a randomized controlled trial on the effect of injections every 4 weeks, 6 weeks and 8  
19 weeks. *Acta Ophthalmol* 2013;91:e456-61.doi:10.1111/aos.12119.
- 20 75 Ma L, Dou HL, Huang YM, et al. Improvement of retinal function in early age-related macular  
21 degeneration after lutein and zeaxanthin supplementation: a randomized, double-masked, placebo-  
22 controlled trial. *Am J Ophthalmol* 2012;154:625-34 e1.doi:10.1016/j.ajo.2012.04.014.
- 23 76 Ma L, Yan SF, Huang YM, et al. Effect of lutein and zeaxanthin on macular pigment and visual  
24 function in patients with early age-related macular degeneration. *Ophthalmology* 2012;119:2290-  
25 7.doi:10.1016/j.ophtha.2012.06.014.
- 26 77 Maberley D, Canadian Retinal Trials G. Photodynamic therapy and intravitreal triamcinolone for  
27 neovascular age-related macular degeneration: a randomized clinical trial. *Ophthalmology*  
28 2009;116:2149-57 e1.doi:10.1016/j.ophtha.2009.04.032.
- 29 78 Marcus DM, Peskin E, Maguire M, et al. The age-related macular degeneration radiotherapy trial  
30 (AMDRT): one year results from a pilot study. *Am J Ophthalmol* 2004;138:818-  
31 28.doi:10.1016/j.ajo.2004.06.081.
- 32 79 Mata NL, Lichter JB, Vogel R, et al. Investigation of oral fenretinide for treatment of geographic  
33 atrophy in age-related macular degeneration. *Retina* 2013;33:498-  
34 507.doi:10.1097/IAE.0b013e318265801d.
- 35 80 Menon G, Chandran M, Sivaprasad S, et al. Is it necessary to use three mandatory loading doses  
36 when commencing therapy for neovascular age-related macular degeneration using bevacizumab?  
37 (BeMOc Trial). *Eye (Lond)* 2013;27:959-63.doi:10.1038/eye.2013.93.
- 38 81 Metelitsina TI, Grunwald JE, DuPont JC, et al. Effect of niacin on the choroidal circulation of  
39 patients with age related macular degeneration. *Br J Ophthalmol* 2004;88:1568-  
40 72.doi:10.1136/bjo.2004.046607.
- 41 82 Metelitsina TI, Grunwald JE, DuPont JC, et al. Effect of Viagra on the foveolar choroidal circulation  
42 of AMD patients. *Exp Eye Res* 2005;81:159-64.doi:10.1016/j.exer.2005.01.017.
- 43 83 Metelitsina TI, Grunwald JE, DuPont JC, et al. Effect of viagra on retinal vein diameter in AMD  
44 patients. *Exp Eye Res* 2006;83:128-32.doi:10.1016/j.exer.2005.11.012.
- 45 84 Michels S, Wachtlin J, Gamulescu MA, et al. Comparison of early retreatment with the standard  
46 regimen in verteporfin therapy of neovascular age-related macular degeneration. *Ophthalmology*  
47 2005;112:2070-5.doi:10.1016/j.ophtha.2005.06.034.
- 48 85 Modarres M, Naseripour M, Falavarjani KG, et al. Intravitreal injection of 2.5 mg versus 1.25 mg  
49 bevacizumab (Avastin) for treatment of CNV associated with AMD. *Retina* 2009;29:319-  
50 24.doi:10.1097/IAE.0b013e318198148e.
- 51 86 Murray IJ, Makridaki M, van der Veen RL, et al. Lutein supplementation over a one-year period in  
52 early AMD might have a mild beneficial effect on visual acuity: the CLEAR study. *Invest Ophthalmol*  
53 *Vis Sci* 2013;54:1781-8.doi:10.1167/iovs.12-10715.
- 54  
55  
56  
57  
58  
59  
60

- 1  
2  
3 87 Myint K, Armbrecht AM, Mon S, et al. Transpupillary thermotherapy for the treatment of occult  
4 CNV in age-related macular degeneration: a prospective randomized controlled pilot study. *Acta*  
5 *Ophthalmol Scand* 2006;84:328-32.doi:10.1111/j.1600-0420.2005.00623.x.  
6  
7 88 Neovascular Age-Related Macular Degeneration PC, Photodynamic Therapy Trial Research G,  
8 Gilson MM, et al. Periocular triamcinolone and photodynamic therapy for subfoveal choroidal  
9 neovascularization in age-related macular degeneration. *Ophthalmology* 2007;114:1713-  
10 21.doi:10.1016/j.optha.2007.03.071.  
11  
12 89 Nguyen QD, Campochiaro PA, Shah SM, et al. Evaluation of very high- and very low-dose  
13 intravitreal aflibercept in patients with neovascular age-related macular degeneration. *J Ocul*  
14 *Pharmacol Ther* 2012;28:581-8.doi:10.1089/jop.2011.0261.  
15  
16 90 Nguyen QD, Schachar RA, Nduaka CI, et al. Evaluation of the siRNA PF-04523655 versus  
17 ranibizumab for the treatment of neovascular age-related macular degeneration (MONET Study).  
18 *Ophthalmology* 2012;119:1867-73.doi:10.1016/j.optha.2012.03.043.  
19  
20 91 Nguyen QD, Shah SM, Hafiz G, et al. A phase I trial of an IV-administered vascular endothelial  
21 growth factor trap for treatment in patients with choroidal neovascularization due to age-related  
22 macular degeneration. *Ophthalmology* 2006;113:1522 e1- e14.doi:10.1016/j.optha.2006.05.055.  
23  
24 92 Nussenblatt RB, Byrnes G, Sen HN, et al. A randomized pilot study of systemic immunosuppression  
25 in the treatment of age-related macular degeneration with choroidal neovascularization. *Retina*  
26 2010;30:1579-87.doi:10.1097/IAE.0b013e3181e7978e.  
27  
28 93 Odergren A, Algvere PV, Seregard S, et al. A prospective randomised study on low-dose  
29 transpupillary thermotherapy versus photodynamic therapy for neovascular age-related macular  
30 degeneration. *Br J Ophthalmol* 2008;92:757-61.doi:10.1136/bjo.2007.133561.  
31  
32 94 Parodi MB, Toto L, Mastropasqua L, et al. Prismatic correction in patients affected by age-related  
33 macular degeneration. *Clin Rehabil* 2004;18:828-32.doi:10.1191/0269215504cr801oa.  
34  
35 95 Piermarocchi S, Sartore M, Lo Giudice G, et al. Combination of photodynamic therapy and  
36 intraocular triamcinolone for exudative age-related macular degeneration and long-term  
37 chorioretinal macular atrophy. *Arch Ophthalmol* 2008;126:1367-  
38 74.doi:10.1001/archophth.126.10.1367.  
39  
40 96 Piermarocchi S, Saviano S, Parisi V, et al. Carotenoids in Age-related Maculopathy Italian Study  
41 (CARMIS): two-year results of a randomized study. *Eur J Ophthalmol* 2012;22:216-  
42 25.doi:10.5301/ejo.5000069.  
43  
44 97 Potter MJ, Claudio CC, Szabo SM. A randomised trial of bevacizumab and reduced light dose  
45 photodynamic therapy in age-related macular degeneration: the VIA study. *Br J Ophthalmol*  
46 2010;94:174-9.doi:10.1136/bjo.2008.155531.  
47  
48 98 Pulido JS, Winters JL, Boyer D. Preliminary analysis of the final multicenter investigation of  
49 rheopheresis for age related macular degeneration (AMD) trial (MIRA-1) results. *Trans Am*  
50 *Ophthalmol Soc* 2006;104:221-31  
51  
52 99 Ranchod TM, Ray SK, Daniels SA, et al. LuceDex: a prospective study comparing ranibizumab plus  
53 dexamethasone combination therapy versus ranibizumab monotherapy for neovascular age-related  
54 macular degeneration. *Retina* 2013;33:1600-4.doi:10.1097/IAE.0b013e318285cb71.  
55  
56 100 Regillo CD, Brown DM, Abraham P, et al. Randomized, double-masked, sham-controlled trial of  
57 ranibizumab for neovascular age-related macular degeneration: PIER Study year 1. *Am J Ophthalmol*  
58 2008;145:239-48.doi:10.1016/j.ajo.2007.10.004.  
59  
60 101 Rencova E, Blaha M, Studnicka J, et al. Haemorheopheresis could block the progression of the  
dry form of age-related macular degeneration with soft drusen to the neovascular form. *Acta*  
*Ophthalmol* 2011;89:463-71.doi:10.1111/j.1755-3768.2009.01710.x.  
102 Richer S, Devenport J, Lang JC. LAST II: Differential temporal responses of macular pigment  
optical density in patients with atrophic age-related macular degeneration to dietary  
supplementation with xanthophylls. *Optometry* 2007;78:213-9.doi:10.1016/j.optm.2006.10.019.  
103 Richer S, Stiles W, Statkute L, et al. Double-masked, placebo-controlled, randomized trial of  
lutein and antioxidant supplementation in the intervention of atrophic age-related macular  
degeneration: the Veterans LAST study (Lutein Antioxidant Supplementation Trial). *Optometry*  
2004;75:216-30

- 1  
2  
3 104 Richer SP, Stiles W, Graham-Hoffman K, et al. Randomized, double-blind, placebo-controlled  
4 study of zeaxanthin and visual function in patients with atrophic age-related macular degeneration:  
5 the Zeaxanthin and Visual Function Study (ZVF) FDA IND #78, 973. *Optometry* 2011;82:667-80  
6 e6.doi:10.1016/j.optm.2011.08.008.  
7  
8 105 Rosenfeld PJ, Boyer DS, Bressler NM, et al. Verteporfin therapy of subfoveal occult choroidal  
9 neovascularization in AMD using delayed light application: one-year results of the VALIO Study. *Am J*  
10 *Ophthalmol* 2007;144:970-2.doi:10.1016/j.ajo.2007.08.017.  
11  
12 106 Rosenfeld PJ, Brown DM, Heier JS, et al. Ranibizumab for neovascular age-related macular  
13 degeneration. *N Engl J Med* 2006;355:1419-31.doi:10.1056/NEJMoa054481.  
14  
15 107 Rosenfeld PJ, Heier JS, Hantsbarger G, et al. Tolerability and efficacy of multiple escalating doses  
16 of ranibizumab (Lucentis) for neovascular age-related macular degeneration. *Ophthalmology*  
17 2006;113:623 e1.doi:10.1016/j.ophtha.2006.01.027.  
18  
19 108 Rosenthal JM, Kim J, de Monasterio F, et al. Dose-ranging study of lutein supplementation in  
20 persons aged 60 years or older. *Invest Ophthalmol Vis Sci* 2006;47:5227-33.doi:10.1167/iovs.05-  
21 1513.  
22  
23 109 Russo A, Costagliola C, Delcassi L, et al. A randomised controlled trial of ranibizumab with and  
24 without ketorolac eyedrops for exudative age-related macular degeneration. *Br J Ophthalmol*  
25 2013;97:1273-6.doi:10.1136/bjophthalmol-2013-303417.  
26  
27 110 Sacu S, Michels S, Prager F, et al. Randomised clinical trial of intravitreal Avastin vs photodynamic  
28 therapy and intravitreal triamcinolone: long-term results. *Eye (Lond)* 2009;23:2223-  
29 7.doi:10.1038/eye.2008.423.  
30  
31 111 Sacu S, Varga A, Michels S, et al. Reduced fluence versus standard photodynamic therapy in  
32 combination with intravitreal triamcinolone: short-term results of a randomised study. *Br J*  
33 *Ophthalmol* 2008;92:1347-51.doi:10.1136/bjo.2008.137885.  
34  
35 112 Sadda SR, Stoller G, Boyer DS, et al. Anatomical benefit from ranibizumab treatment of  
36 predominantly classic neovascular age-related macular degeneration in the 2-year anchor study.  
37 *Retina* 2010;30:1390-9.doi:10.1097/IAE.0b013e3181e44599.  
38  
39 113 Sarraf D, Chan C, Rahimy E, et al. Prospective evaluation of the incidence and risk factors for the  
40 development of RPE tears after high- and low-dose ranibizumab therapy. *Retina* 2013;33:1551-  
41 7.doi:10.1097/IAE.0b013e31828992f5.  
42  
43 114 Schmid-Kubista KE, Krebs I, Ansari-Shahrezaei S, et al. Comparing treatment of neovascular age-  
44 related macular degeneration with sequential intravitreal Avastin and Macugen versus intravitreal  
45 mono-therapy--a pilot study. *Curr Eye Res* 2011;36:958-63.doi:10.3109/02713683.2011.597536.  
46  
47 115 Schmid-Kubista KE, Krebs I, Gruenberger B, et al. Systemic bevacizumab (Avastin) therapy for  
48 exudative neovascular age-related macular degeneration. The BEAT-AMD-Study. *Br J Ophthalmol*  
49 2009;93:914-9.doi:10.1136/bjo.2008.144410.  
50  
51 116 Schmidt-Erfurth U, Eldem B, Guymer R, et al. Efficacy and safety of monthly versus quarterly  
52 ranibizumab treatment in neovascular age-related macular degeneration: the EXCITE study.  
53 *Ophthalmology* 2011;118:831-9.doi:10.1016/j.ophtha.2010.09.004.  
54  
55 117 Schmidt-Erfurth U, Kaiser PK, Korobelnik JF, et al. Intravitreal aflibercept injection for  
56 neovascular age-related macular degeneration: ninety-six-week results of the VIEW studies.  
57 *Ophthalmology* 2014;121:193-201.doi:10.1016/j.ophtha.2013.08.011.  
58  
59 118 Schmidt-Erfurth U, Sacu S, Early Retreatment Study G. Randomized multicenter trial of more  
60 intense and standard early verteporfin treatment of neovascular age-related macular degeneration.  
*Ophthalmology* 2008;115:134-40.doi:10.1016/j.ophtha.2007.02.033.  
119 Schmidt-Erfurth UM, Elsner H, Terai N, et al. Effects of verteporfin therapy on central visual field  
function. *Ophthalmology* 2004;111:931-9.doi:10.1016/j.ophtha.2003.12.025.  
120 Sin M, Chrapek O, Karhanova M, et al. Progression of macular atrophy after PDT combined with  
the COX-2 inhibitor Nabumetone in the treatment of neovascular ARMD. *Biomed Pap Med Fac Univ*  
*Palacky Olomouc Czech Repub* 2014;158:138-43.doi:10.5507/bp.2012.066.  
121 Singerman LJ, Masonson H, Patel M, et al. Pegaptanib sodium for neovascular age-related  
macular degeneration: third-year safety results of the VEGF Inhibition Study in Ocular  
Neovascularisation (VISION) trial. *Br J Ophthalmol* 2008;92:1606-11.doi:10.1136/bjo.2007.132597.

- 1  
2  
3 122 Slakter JS, Bochow TW, D'Amico DJ, et al. Anecortave acetate (15 milligrams) versus  
4 photodynamic therapy for treatment of subfoveal neovascularization in age-related macular  
5 degeneration. *Ophthalmology* 2006;113:3-13.doi:10.1016/j.ophtha.2005.10.019.  
6  
7 123 Soderberg AC, Algvere PV, Hengstler JC, et al. Combination therapy with low-dose transpupillary  
8 thermotherapy and intravitreal ranibizumab for neovascular age-related macular degeneration: a 24-  
9 month prospective randomised clinical study. *Br J Ophthalmol* 2012;96:714-  
10 8.doi:10.1136/bjophthalmol-2011-300721.  
11 124 Souayah N, Khella SL. A prospective double-blind, placebo-controlled study of thalidomide  
12 sensory symptoms in an elderly population with age-related macular degeneration. *J Clin Neurosci*  
13 2010;17:571-3.doi:10.1016/j.jocn.2009.09.017.  
14 125 Souied EH, Delcourt C, Querques G, et al. Oral docosahexaenoic acid in the prevention of  
15 exudative age-related macular degeneration: the Nutritional AMD Treatment 2 study.  
16 *Ophthalmology* 2013;120:1619-31.doi:10.1016/j.ophtha.2013.01.005.  
17 126 Subramanian ML, Abedi G, Ness S, et al. Bevacizumab vs ranibizumab for age-related macular  
18 degeneration: 1-year outcomes of a prospective, double-masked randomised clinical trial. *Eye (Lond)*  
19 2010;24:1708-15.doi:10.1038/eye.2010.147.  
20 127 Subramanian ML, Ness S, Abedi G, et al. Bevacizumab vs ranibizumab for age-related macular  
21 degeneration: early results of a prospective double-masked, randomized clinical trial. *Am J*  
22 *Ophthalmol* 2009;148:875-82 e1.doi:10.1016/j.ajo.2009.07.009.  
23 128 Sun YD, Dong YD, Fan R, et al. Effect of (R)-alpha-lipoic acid supplementation on serum lipids and  
24 antioxidative ability in patients with age-related macular degeneration. *Ann Nutr Metab*  
25 2012;60:293-7.doi:10.1159/000338444.  
26 129 Tufail A, Patel PJ, Egan C, et al. Bevacizumab for neovascular age related macular degeneration  
27 (ABC Trial): multicentre randomised double masked study. *BMJ*  
28 2010;340:c2459.doi:10.1136/bmj.c2459.  
29 130 Vallance JH, Johnson B, Majid MA, et al. A randomised prospective double-masked exploratory  
30 study comparing combination photodynamic treatment and intravitreal ranibizumab vs intravitreal  
31 ranibizumab monotherapy in the treatment of neovascular age-related macular degeneration. *Eye*  
32 *(Lond)* 2010;24:1561-7.doi:10.1038/eye.2010.84.  
33 131 Weigert G, Kaya S, Pemp B, et al. Effects of lutein supplementation on macular pigment optical  
34 density and visual acuity in patients with age-related macular degeneration. *Invest Ophthalmol Vis Sci*  
35 2011;52:8174-8.doi:10.1167/iovs.11-7522.  
36 132 Weigert G, Michels S, Sacu S, et al. Intravitreal bevacizumab (Avastin) therapy versus  
37 photodynamic therapy plus intravitreal triamcinolone for neovascular age-related macular  
38 degeneration: 6-month results of a prospective, randomised, controlled clinical study. *Br J*  
39 *Ophthalmol* 2008;92:356-60.doi:10.1136/bjo.2007.125823.  
40 133 Yehoshua Z, de Amorim Garcia Filho CA, Nunes RP, et al. Systemic complement inhibition with  
41 eculizumab for geographic atrophy in age-related macular degeneration: the COMPLETE study.  
42 *Ophthalmology* 2014;121:693-701.doi:10.1016/j.ophtha.2013.09.044.  
43 134 Zambarakji HJ, Lane AM, Ezra E, et al. Proton beam irradiation for neovascular age-related  
44 macular degeneration. *Ophthalmology* 2006;113:2012-9.doi:10.1016/j.ophtha.2006.05.036.  
45 135 Zhang K, Hopkins JJ, Heier JS, et al. Ciliary neurotrophic factor delivered by encapsulated cell  
46 intraocular implants for treatment of geographic atrophy in age-related macular degeneration. *Proc*  
47 *Natl Acad Sci U S A* 2011;108:6241-5.doi:10.1073/pnas.1018987108.  
48 136 Ziemssen F, Luke M, Bartz-Schmidt KU, et al. Time-dependent effects on contrast sensitivity, near  
49 and distance acuity: difference in functional parameters? (Prospective, randomized pilot trial of  
50 photodynamic therapy versus full macular translocation). *Graefes Arch Clin Exp Ophthalmol*  
51 2008;246:653-9.doi:10.1007/s00417-007-0726-y.  
52  
53  
54  
55  
56  
57  
58  
59  
60



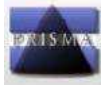

# PRISMA 2009 Checklist

| Section/topic                      | #  | Checklist item                                                                                                                                                                                                                                                                                              | Reported on page # |
|------------------------------------|----|-------------------------------------------------------------------------------------------------------------------------------------------------------------------------------------------------------------------------------------------------------------------------------------------------------------|--------------------|
| <b>TITLE</b>                       |    |                                                                                                                                                                                                                                                                                                             |                    |
| Title                              | 1  | Identify the report as a systematic review, meta-analysis, or both.                                                                                                                                                                                                                                         | 1                  |
| <b>ABSTRACT</b>                    |    |                                                                                                                                                                                                                                                                                                             |                    |
| Structured summary                 | 2  | Provide a structured summary including, as applicable: background; objectives; data sources; study eligibility criteria, participants, and interventions; study appraisal and synthesis methods; results; limitations; conclusions and implications of key findings; systematic review registration number. | 2                  |
| <b>INTRODUCTION</b>                |    |                                                                                                                                                                                                                                                                                                             |                    |
| Rationale                          | 3  | Describe the rationale for the review in the context of what is already known.                                                                                                                                                                                                                              | 4                  |
| Objectives                         | 4  | Provide an explicit statement of questions being addressed with reference to participants, interventions, comparisons, outcomes, and study design (PICOS).                                                                                                                                                  | 4                  |
| <b>METHODS</b>                     |    |                                                                                                                                                                                                                                                                                                             |                    |
| Protocol and registration          | 5  | Indicate if a review protocol exists, if and where it can be accessed (e.g., Web address), and, if available, provide registration information including registration number.                                                                                                                               | -                  |
| Eligibility criteria               | 6  | Specify study characteristics (e.g., PICOS, length of follow-up) and report characteristics (e.g., years considered, language, publication status) used as criteria for eligibility, giving rationale.                                                                                                      | 5                  |
| Information sources                | 7  | Describe all information sources (e.g., databases with dates of coverage, contact with study authors to identify additional studies) in the search and date last searched.                                                                                                                                  | 5                  |
| Search                             | 8  | Present full electronic search strategy for at least one database, including any limits used, such that it could be repeated.                                                                                                                                                                               | 5                  |
| Study selection                    | 9  | State the process for selecting studies (i.e., screening, eligibility, included in systematic review, and, if applicable, included in the meta-analysis).                                                                                                                                                   | 5                  |
| Data collection process            | 10 | Describe method of data extraction from reports (e.g., piloted forms, independently, in duplicate) and any processes for obtaining and confirming data from investigators.                                                                                                                                  | 6                  |
| Data items                         | 11 | List and define all variables for which data were sought (e.g., PICOS, funding sources) and any assumptions and simplifications made.                                                                                                                                                                       | 6                  |
| Risk of bias in individual studies | 12 | Describe methods used for assessing risk of bias of individual studies (including specification of whether this was done at the study or outcome level), and how this information is to be used in any data synthesis.                                                                                      | 3                  |
| Summary measures                   | 13 | State the principal summary measures (e.g., risk ratio, difference in means).                                                                                                                                                                                                                               | 6                  |
| Synthesis of results               | 14 | Describe the methods of handling data and combining results of studies, if done, including measures of consistency (e.g., $I^2$ ) for each meta-analysis.                                                                                                                                                   | 6                  |

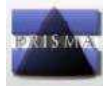

# PRISMA 2009 Checklist

| Section/topic                 | #  | Checklist item                                                                                                                                                                                           | Reported on page # |
|-------------------------------|----|----------------------------------------------------------------------------------------------------------------------------------------------------------------------------------------------------------|--------------------|
| Risk of bias across studies   | 15 | Specify any assessment of risk of bias that may affect the cumulative evidence (e.g., publication bias, selective reporting within studies).                                                             | --                 |
| Additional analyses           | 16 | Describe methods of additional analyses (e.g., sensitivity or subgroup analyses, meta-regression), if done, indicating which were pre-specified.                                                         | 7                  |
| <b>RESULTS</b>                |    |                                                                                                                                                                                                          |                    |
| Study selection               | 17 | Give numbers of studies screened, assessed for eligibility, and included in the review, with reasons for exclusions at each stage, ideally with a flow diagram.                                          | 7                  |
| Study characteristics         | 18 | For each study, present characteristics for which data were extracted (e.g., study size, PICOS, follow-up period) and provide the citations.                                                             | 8                  |
| Risk of bias within studies   | 19 | Present data on risk of bias of each study and, if available, any outcome level assessment (see item 12).                                                                                                | --                 |
| Results of individual studies | 20 | For all outcomes considered (benefits or harms), present, for each study: (a) simple summary data for each intervention group (b) effect estimates and confidence intervals, ideally with a forest plot. | 8-13               |
| Synthesis of results          | 21 | Present results of each meta-analysis done, including confidence intervals and measures of consistency.                                                                                                  | 13                 |
| Risk of bias across studies   | 22 | Present results of any assessment of risk of bias across studies (see Item 15).                                                                                                                          | --                 |
| Additional analysis           | 23 | Give results of additional analyses, if done (e.g., sensitivity or subgroup analyses, meta-regression [see Item 16]).                                                                                    | 13                 |
| <b>DISCUSSION</b>             |    |                                                                                                                                                                                                          |                    |
| Summary of evidence           | 24 | Summarize the main findings including the strength of evidence for each main outcome; consider their relevance to key groups (e.g., healthcare providers, users, and policy makers).                     | 14-15              |
| Limitations                   | 25 | Discuss limitations at study and outcome level (e.g., risk of bias), and at review-level (e.g., incomplete retrieval of identified research, reporting bias).                                            | 16-17              |
| Conclusions                   | 26 | Provide a general interpretation of the results in the context of other evidence, and implications for future research.                                                                                  | 17                 |
| <b>FUNDING</b>                |    |                                                                                                                                                                                                          |                    |
| Funding                       | 27 | Describe sources of funding for the systematic review and other support (e.g., supply of data); role of funders for the systematic review.                                                               | 19/3               |

From: Moher D, Liberati A, Tetzlaff J, Altman DG, The PRISMA Group (2009). Preferred Reporting Items for Systematic Reviews and Meta-Analyses: The PRISMA Statement. PLoS Med 6(6): e1000097. doi:10.1371/journal.pmed1000097

For more information, visit: [www.prisma-statement.org](http://www.prisma-statement.org).
